# Supplementary material for: Identification of non-invasive miRNAs biomarkers for prostate cancer by deep sequencing analysis of urinary exosomes
Source: Springer Nature journal article supplement (doi:10.1186/s12943-017-0726-4), 2017-10-05
Supplement: MOESM1 [file 15111634]

## Supplementary information

### - Materials and methods

### - Supplementary Table legends

**Table S1.** Number of total reads, and reads mapped and unmapped to the genome per sample.

**Table S2.** Total list of miRNAs identified by miRDeep2 per sample. MiRNAs with less than 10 reads per million in less than 5 samples are not included. C: control; P: Prostate cancer patient.

### - Supplementary Figure legends

**Figure S1.** Typical profile of RNA from urinary exosomes in Agilent RNA 6000 Pico chips.

**Figure S2.** Hierarchical clustering analysis of the miRNAs identified in urinary exosomes. Blue: healthy controls. Pink: Prostate cancer patients with Gleason score 7a (3+4). Green: Prostate cancer patients with Gleason score 7b (4+3).

**Figure S3.** Amount (reads per million, RPM) of A. miR-501-3p, B. miR-92-1-5p and C. miR-34a-5p in 9 healthy controls and 20 PCa patients.

**Figure S4.** ROC curves for A. miR-196a-5p (AUC=0.92, 95% CI 0.7905 to 1.065) and B. miR-143-3p (AUC=0.72, 95% CI 0.4784 to 0.9660). AUC, area under the curve; CI, confidence interval.

**Figure S5.** Boxplots showing RNA-sequencing expression (reads per million, RPM) of miR196a-5p. A. Differences between healthy controls, PCa Gleason score 7a and PCa Gleason score 7b. B. Differences between healthy control, PCa intermediate and PCa aggressive as evaluated following D'Amico criteria.

**Figure S6.** Boxplots showing the RNA-sequencing expression (reads per million, RPM) of the microRNAs used for normalization of the qPCR results. A. miR-10b-5p. B. Let-7b-5p.

**Figure S7.** RT-qPCR analysis of A. miR-34a-5p and B. miR-92a-1-5p in 19 healthy controls and 28 PCa patients. Data was normalized to the average of three reference genes (miR-10b-5p, let-7b-5p and U6 snRNA).

**Figure S8.** Analysis of miR-196a-5p in DIANA-miRPath v3.0 [26] identified the KEGG pathway *Prostate cancer (hsa05215)* with a p-value under 0.05. The 16 genes of the pathway are indicated in yellow boxes: BRAF, E2F2, NRAS, CDK2, HSP90AA1, RAF1, CDKN1B, IGF1R, CCND1, CCNE2, HSP90AB1, NFKBIA, AKT3, FOXO1, MAPK1, MDM2.

## **MATERIALS AND METHODS**

### **Urine Samples**

Urine samples (29 samples for NGS analysis and 47 samples for RT-qPCR validation) were collected from healthy controls and PCa patients approximately 1 week before prostatectomy as previously described [1,2]. The pH in urine samples and the presence of leucocytes, nitrites, proteins, glucose, ketones and blood were analysed with a Combur-Test strip in an Urysys 1100 urine analyser (Roche Diagnostics, Basel, Switzerland). The collection of urine samples was approved by the Norwegian Regional Committees for Medical and Health Research Ethics and the participants gave informed written consent.

### **Isolation of urinary exosomes**

Exosomes were isolated from fresh urine samples by differential centrifugation as previously described [2]. Briefly, urine samples (in general 50-150 mL) were centrifuged at 2,000 g for 15 min at room temperature (RT), and then at 10,000 g for 30 min at RT to remove cell debris and large particles. The supernatant was then centrifuged at 100,000 g for 70 min at RT in a Ti70 rotor (fixed angle), and the pellet was washed with phosphate-buffered saline (PBS) and pelleted again at 100,000 g for 70 min at 4 °C in a Ti70 rotor. Exosomes were then resuspended in PBS, vortexed, filtrated through a 200-nm pore Supor syringe filter (Pall, Port Washington, NY, USA) and finally pelleted at 100,000 g for 70 min at 4 °C in a SW40 rotor (swinging bucket). The supernatant was removed leaving 50–100 µL in the bottom to resuspend the pellet. Exosomes were submitted to several analyses to control the purity and yield, and they were then stored at –80 °C for subsequent applications.

### **Protein measurements**

The amount of protein in exosomes was determined using a bicinchoninic acid (BCA) assay kit (Thermo Scientific, Rockford, IL, USA) according to the manufacturer's instructions. Bovine serum albumin was used as standard protein.

### **RNA extraction of urinary EVs**

Samples of urinary exosomes (approximately 5 µg protein as measured with the BCA assay) were treated with Proteinase K (Sigma-Aldrich) for 60 min and RNase A (Roche Diagnostics) for 15 min. Total RNA was extracted from exosomes using a miRNeasy Micro Kit (Qiagen) according to the manufacturer's instructions and eluted in 15 µL of RNase-free water. After that, total RNA was treated with DNase (Ambion) for 15 min. The extracted RNA was run in an Agilent 2100 Bioanalyzer using a RNA 6000 Pico Kit (Agilent Technologies) to detect potential degradation and ribosomal contamination.

### **Next generation sequencing**

NGS was performed at the Genomics Core Facility Oslo (The Norwegian Radium Hospital, Norway). Small RNA libraries were prepared using the CleanTag Small RNA library prep kit (TriLink Biotechnologies, USA). Total RNA (1-4 ng) was ligated to 3'- and 5'- RNA adapters, and reversely transcribed to generate cDNA libraries for each sample. Libraries were PCR amplified, pooled and size selected using acrylamide gel (6%, Novex TBE Gel, Thermo Fisher Scientific) purification before and then quantified by real-time PCR. Small RNA libraries were sequenced single read 50 base pairs using a NextSeq500 (Illumina) instrument. Real-time analysis, base calling and filtering of low quality reads were done by Illumina's software packages (SCS2.9/RTA1.9 and Off-line Basecaller v1.9). Fastq files for each sample were analysed using the software package miRDeep2 to map the sequencing reads to the human genome (hg19), identify miRNAs (miRBase, <http://www.mirbase.org/>) and normalize the expression values (read count normalization) for expression profiling across samples.

## RT-qPCR

cDNA synthesis from exosomal RNA was performed using miRCURY LNA Universal RT microRNA PCR, polyadenylation and cDNA synthesis kit (Exiqon) according to the manufacturer's protocol. A C1000 thermal cycler (Bio-Rad, Oslo, Norway) running for 60 min at 42 °C and for 5 min at 95 °C was used. A RNA spike-in provided with the kit was added to the RNA samples as a control. Real-time qPCR was performed using a LightCycler 480 (Roche Applied Science, Mannheim, Germany) at the following conditions: 95 °C for 10 min, thereafter 45 amplification cycles at 95 °C for 10 s, and 60 °C for 1 min (ramp-rate 1.6 °C/s). The target sequences (5'-3') of the primer sets were:

miR-196a-5p (UAGGUAGUUUCAUGUUGUUGGG),

miR-34a-5p (UGGCAGUGUCUUAGCUGGUUGU),

miR-143-3p (UGAGAUGAAGCACUGUAGCUC),

miR-501-3p (AAUGCACCCGGGCAAGGAUUCU),

miR-92a-1-5p (AGGUUGGGGAUCGGUUGCAAUGCU),

miR-10b-5p (UACCCUGUAGAACCGAAUUUGUG),

let-7b-5p (UGAGGUAGUAGGUUGUGUGGU),

U6 snRNA(GUGCUCGCUUCGGCAGCACAUAUACUAAAAUUGGAACGAUACAGAG

AAGAUUAGCAUGGCCCCUGCGCAAGGAUGACACGCAAUUCGUGAAGCGUCCAUA  
UUUUU).

miRNAs with  $C_q$  values above 37 were considered as not expressed.

## Statistical analysis

The NGS data were analyzed in J-Express 2011. In the analysis, only miRNAs with more than 10 reads in at least 5 samples were included. The filtered dataset was then Log<sub>2</sub>-transformed. Dataset used for unsupervised two-way hierarchical clustering was in addition mean normalized prior to clustering. Two statistical analysis were performed, the rank product (20,000 permutations) [3] and SAM (Significance analysis of microarrays) (20,000 permutations) [4]. For analysis of RT-qPCR data the comparative  $C_q$  method was used, using miR-10b-5p, miR-let7b-5p and U6 snRNA for normalization. Statistical analysis was executed using a Mann–Whitney  $U$  test. A  $P$ -value<0.05 was considered as significant. Receiver operating characteristic (ROC) curves were done in Prism V (Graphpad Software).

## References

1. Skotland T, Ekroos K, Kauhanen D, Simolin H, Seierstad T, Berge V, et al. Molecular lipid species in urinary exosomes as potential prostate cancer biomarkers. *Eur J Cancer*. 2017;70:122–32.
2. Øverbye A, Skotland T, Koehler CJ, Thiede B, Seierstad T, Berge V, et al. Identification of prostate cancer biomarkers in urinary exosomes. *Oncotarget*. 2015;6:30357–76.
3. Breitling R, Armengaud P, Amtmann A, Herzyk P. Rank products: a simple, yet powerful, new method to detect differentially regulated genes in replicated microarray experiments. *FEBS Lett*. 2004;573:83–92.
4. Tusher VG, Tibshirani R, Chu G. Significance analysis of microarrays applied to the ionizing radiation response. *Proc Natl Acad Sci*. 2001;98:5116–21.

| <b>Sample Type</b> | <b>Total</b> | <b>Mapped</b> | <b>Unmapped</b> | <b>% mapped</b> | <b>% unmapped</b> |
|--------------------|--------------|---------------|-----------------|-----------------|-------------------|
| C1                 | 14744662     | 4939713       | 9804949         | 33.5%           | 66.5%             |
| C2                 | 25069160     | 5694612       | 19374548        | 22.7%           | 77.3%             |
| C3                 | 6097126      | 2949820       | 3147306         | 48.4%           | 51.6%             |
| C4                 | 5077743      | 2577090       | 2500653         | 50.8%           | 49.2%             |
| C5                 | 5740963      | 4345992       | 1394971         | 75.7%           | 24.3%             |
| C6                 | 6529973      | 3449163       | 3080810         | 52.8%           | 47.2%             |
| C7                 | 3699322      | 2545515       | 1153807         | 68.8%           | 31.2%             |
| C8                 | 3324769      | 2179708       | 1145061         | 65.6%           | 34.4%             |
| C9                 | 4595931      | 3216591       | 1379340         | 70 %            | 30 %              |
| P1                 | 5042205      | 3186596       | 1855609         | 63.2%           | 36.8%             |
| P2                 | 4775506      | 2627659       | 2147847         | 55 %            | 45 %              |
| P3                 | 5132138      | 3372857       | 1759281         | 65.7%           | 34.3%             |
| P4                 | 5179459      | 2905727       | 2273732         | 56.1%           | 43.9%             |
| P5                 | 2955057      | 2224494       | 730563          | 75.3%           | 24.7%             |
| P6                 | 4181980      | 2511715       | 1670265         | 60.1%           | 39.9%             |
| P7                 | 4149457      | 3209495       | 939962          | 77.3%           | 22.7%             |
| P8                 | 1983881      | 1449041       | 534840          | 73 %            | 27 %              |
| P9                 | 4222884      | 3012547       | 1210337         | 71.3%           | 28.7%             |
| P10                | 3088721      | 2281632       | 807089          | 73.9%           | 26.1%             |
| P11                | 6878342      | 3940850       | 2937492         | 57.3%           | 42.7%             |
| P12                | 42596844     | 7589966       | 35006878        | 17.8%           | 82.2%             |
| P13                | 8541862      | 3999053       | 4542809         | 46.8%           | 53.2%             |
| P14                | 5315745      | 3782073       | 1533672         | 71.1%           | 28.9%             |
| P15                | 4894333      | 3383056       | 1511277         | 69.1%           | 30.9%             |
| P16                | 4655944      | 2762665       | 1893279         | 59.3%           | 40.7%             |
| P17                | 5212260      | 4059364       | 1152896         | 77.9%           | 22.1%             |
| P18                | 4752999      | 3896576       | 856423          | 82 %            | 18 %              |
| P19                | 2544154      | 1775456       | 768698          | 69.8%           | 30.2%             |
| P20                | 3956526      | 2883126       | 1073400         | 72.9%           | 27.1%             |

**- Table S1 -**

| #miRNA            | C1       | C2       | C3       | C10      | C5       | C6       | C7       | C8       | C9       | P1       | P2       | P3       | P4       | P5       | P6       | P7       | P8       | P9       | P10      | P11      | P12      | P13      | P14      | P15      | P16      | P17      | P18      | P19      | P20            | precursor      |
|-------------------|----------|----------|----------|----------|----------|----------|----------|----------|----------|----------|----------|----------|----------|----------|----------|----------|----------|----------|----------|----------|----------|----------|----------|----------|----------|----------|----------|----------|----------------|----------------|
| hsa-let-7a-5p     | 43445.1  | 61968.5  | 30341.9  | 33693.9  | 21264.6  | 33524.5  | 22415.5  | 33367.6  | 18207.3  | 18876.0  | 23506.8  | 12499.6  | 34728.8  | 20408.9  | 29456.4  | 15602.6  | 16848.2  | 25149.8  | 22725.8  | 23261.6  | 116629.9 | 40964.1  | 22103.2  | 20965.0  | 31620.9  | 22067.4  | 20213.5  | 27098.7  | 24590.4        | hsa-let-7a-1   |
| hsa-let-7a-5p     | 43525.4  | 62056.7  | 30400.8  | 33767.3  | 21303.2  | 33595.4  | 22512.0  | 33404.9  | 18223.9  | 18923.4  | 23564.2  | 12552.8  | 34799.1  | 20447.4  | 29517.0  | 15625.0  | 16967.0  | 25195.6  | 22847.3  | 23297.4  | 116744.0 | 41033.5  | 22133.4  | 20619.2  | 31709.0  | 22099.9  | 20238.4  | 27216.8  | 24642.7        | hsa-let-7a-2   |
| hsa-let-7a-5p     | 42214.9  | 63094.2  | 31042.2  | 34961.8  | 22027.7  | 34515.1  | 23073.8  | 34704.5  | 18742.8  | 19289.9  | 24041.1  | 12838.8  | 35633.9  | 21246.0  | 30355.0  | 16255.8  | 17500.4  | 25952.7  | 23818.5  | 23907.3  | 118238.9 | 41861.8  | 22996.0  | 21366.6  | 33038.8  | 22911.8  | 20702.7  | 27657.1  | 25280.9        | hsa-let-7a-3   |
| hsa-let-7b-5p     | 104060.1 | 147858.8 | 73869.9  | 47914.8  | 45345.9  | 78744.0  | 61529.4  | 67738.4  | 49346.1  | 52459.1  | 53332.1  | 33799.6  | 88104.4  | 55841.9  | 80501.0  | 45317.9  | 37252.4  | 56344.3  | 51425.1  | 74890.1  | 226376.2 | 81296.7  | 60854.4  | 65356.5  | 89436.6  | 66537.7  | 50876.4  | 58365.4  | 50264.9        | hsa-let-7b     |
| hsa-let-7c-5p     | 23893.7  | 32887.8  | 12243.5  | 9790.0   | 9597.1   | 17335.7  | 12424.8  | 19888.1  | 8955.1   | 12419.4  | 12909.6  | 7275.7   | 14143.8  | 12173.5  | 14941.2  | 9297.1   | 6620.0   | 15572.4  | 11681.6  | 15316.3  | 53049.7  | 18628.5  | 12907.1  | 12513.8  | 10936.3  | 15308.6  | 7661.8   | 11049.7  | 9965.5         | hsa-let-7c     |
| hsa-let-7d-3p     | 247.3    | 317.3    | 238.4    | 286.0    | 192.9    | 415.5    | 303.2    | 259.0    | 197.4    | 213.0    | 198.2    | 43.6     | 161.9    | 222.3    | 249.4    | 149.7    | 211.2    | 212.5    | 152.9    | 219.2    | 112.2    | 147.0    | 256.9    | 260.7    | 205.6    | 214.5    | 201.5    | 115.5    | 127.2          | hsa-let-7d     |
| hsa-let-7d-5p     | 1815.5   | 2363.5   | 1274.5   | 1186.2   | 865.4    | 1683.3   | 819.3    | 1279.0   | 888.3    | 690.3    | 809.8    | 408.1    | 1173.2   | 792.7    | 1149.6   | 608.1    | 633.5    | 1025.1   | 695.5    | 81.4     | 3060.9   | 1514.6   | 876.1    | 856.6    | 1229.6   | 860.3    | 825.4    | 855.9    | 876.7          | hsa-let-7d     |
| hsa-let-7e-5p     | 3963.7   | 5281.0   | 3630.9   | 1877.2   | 2101.9   | 4563.9   | 3505.5   | 3869.1   | 2711.3   | 2059.2   | 1970.2   | 1462.4   | 3109.4   | 2496.7   | 3793.4   | 1679.6   | 1772.5   | 2729.6   | 2104.0   | 2931.9   | 3326.0   | 3270.9   | 2904.6   | 2668.3   | 3114.3   | 3275.7   | 2614.1   | 2609.7   | 2527.8         | hsa-let-7e     |
| hsa-let-7f-5p     | 13067.8  | 15764.6  | 9498.2   | 10322.0  | 8570.2   | 12909.7  | 8836.5   | 9914.3   | 6440.9   | 6304.7   | 7503.1   | 5449.1   | 8997.2   | 8243.8   | 9624.8   | 5637.9   | 5388.6   | 7709.9   | 6599.5   | 8063.2   | 15719.7  | 12154.4  | 9267.4   | 7760.5   | 10988.3  | 8241.1   | 8748.1   | 7653.4   | 7370.1         | hsa-let-7f-1   |
| hsa-let-7f-5p     | 13130.0  | 15781.0  | 9485.0   | 10252.3  | 8904.9   | 12927.1  | 8831.6   | 9904.2   | 6433.9   | 6462.8   | 7486.9   | 5442.3   | 8987.8   | 8258.2   | 9625.6   | 5646.7   | 7682.7   | 7682.7   | 6597.6   | 8073.3   | 15735.4  | 12069.2  | 9301.5   | 7755.9   | 10974.1  | 8246.2   | 8745.8   | 7709.8   | 10974.1        | hsa-let-7f-2   |
| hsa-let-7g-5p     | 805.6    | 1557.8   | 565.9    | 924.6    | 439.7    | 653.9    | 963.4    | 1163.7   | 385.8    | 475.5    | 529.6    | 138.5    | 569.9    | 412.0    | 492.6    | 334.1    | 208.6    | 574.7    | 338.5    | 435.9    | 2321.0   | 1012.4   | 592.0    | 453.0    | 528.8    | 449.5    | 523.7    | 489.2    | 532.1          | hsa-let-7g     |
| hsa-let-7i-5p     | 3495.6   | 3719.9   | 3085.6   | 2339.1   | 2517.7   | 2830.2   | 2926.6   | 4479.9   | 2389.8   | 2719.8   | 2751.5   | 2475.1   | 2665.6   | 2506.0   | 3767.5   | 2544.4   | 2237.4   | 2897.8   | 1715.5   | 2463.2   | 4040.7   | 2925.0   | 2373.5   | 3921.5   | 2598.7   | 3355.7   | 2711.7   | 2664.4   | 1966.1         | hsa-let-7j     |
| hsa-mir-100-5p    | 175.0    | 158.7    | 134.0    | 227.2    | 95.6     | 122.8    | 82.4     | 170.1    | 74.9     | 37.6     | 64.1     | 39.4     | 58.1     | 52.9     | 60.2     | 44.2     | 142.7    | 83.3     | 87.6     | 138.1    | 82.4     | 176.2    | 63.0     | 26.8     | 53.4     | 39.2     | 45.9     | 47.8     | 43.0           | hsa-mir-100    |
| hsa-mir-101-3p    | 711.0    | 578.2    | 828.8    | 805.9    | 356.1    | 334.7    | 408.5    | 582.7    | 285.8    | 766.7    | 796.1    | 889.7    | 514.9    | 372.2    | 325.0    | 556.5    | 445.6    | 441.0    | 477.7    | 928.7    | 359.7    | 660.9    | 465.8    | 504.9    | 581.5    | 365.4    | 362.5    | 468.8    | 423.2          | hsa-mir-101-1  |
| hsa-mir-101-3p    | 730.1    | 598.7    | 850.0    | 855.7    | 381.9    | 334.7    | 432.9    | 647.2    | 291.9    | 781.5    | 825.9    | 915.3    | 528.5    | 415.8    | 339.9    | 627.8    | 465.6    | 477.9    | 517.4    | 949.2    | 366.4    | 687.8    | 521.3    | 504.9    | 655.0    | 394.4    | 404.7    | 469.3    | 441.8          | hsa-mir-101-2  |
| hsa-mir-103a-3p   | 1869.3   | 3163.6   | 1375.7   | 1384.6   | 1064.3   | 2850.1   | 2077.9   | 2190.6   | 1407.4   | 989.5    | 1184.2   | 790.3    | 1685.6   | 1457.7   | 2098.9   | 1342.3   | 1625.3   | 1924.0   | 1305.9   | 1310.2   | 4320.4   | 1511.0   | 1874.6   | 1711.3   | 3557.5   | 1829.5   | 1921.0   | 1269.9   | 1572.6         | hsa-mir-103a-1 |
| hsa-mir-103a-3p   | 1869.5   | 3163.6   | 1375.7   | 1384.6   | 1064.3   | 2850.1   | 2077.9   | 2190.6   | 1407.4   | 989.5    | 1184.2   | 790.3    | 1685.6   | 1457.7   | 2098.9   | 1342.3   | 1625.3   | 1924.0   | 1306.4   | 1310.2   | 4369.9   | 1522.5   | 1874.6   | 1711.3   | 3568.2   | 1829.5   | 1921.0   | 1289.8   | 1580.6         | hsa-mir-103a-2 |
| hsa-mir-106b-3p   | 37.7     | 136.3    | 54.3     | 22.5     | 54.1     | 104.8    | 70.2     | 79.4     | 94.8     | 61.0     | 43.1     | 70.6     | 47.0     | 58.9     | 70.0     | 56.3     | 197.6    | 72.7     | 48.4     | 27.8     | 224.8    | 50.8     | 63.2     | 112.1    | 45.8     | 90.3     | 86.4     | 53.2     | 72.9           | hsa-mir-106b   |
| hsa-mir-107       | 307.7    | 611.9    | 298.5    | 242.2    | 162.4    | 598.4    | 314.3    | 378.4    | 118.5    | 215.4    | 181.0    | 170.0    | 292.8    | 165.6    | 301.0    | 104.6    | 249.3    | 257.0    | 206.6    | 19.8     | 76.2     | 261.9    | 244.0    | 192.3    | 320.4    | 221.0    | 181.5    | 233.0    | 296.0          | hsa-mir-107    |
| hsa-mir-10a-5p    | 47752.7  | 30423.9  | 43826.1  | 41958.6  | 43275.7  | 53358.6  | 42483.3  | 33140.9  | 49844.1  | 64169.9  | 53189.2  | 51480.9  | 32755.3  | 59835.9  | 44250.1  | 42067.9  | 41171.9  | 64466.8  | 39441.5  | 61241.0  | 3270.7   | 47241.4  | 45489.8  | 51006.5  | 41533.9  | 57347.1  | 50734.7  | 41921.1  | 46384.9        | hsa-mir-10a    |
| hsa-mir-10b-5p    | 375699.0 | 249858.9 | 496967.7 | 577786.3 | 641228.8 | 500173.2 | 588847.0 | 509664.1 | 646598.3 | 596126.7 | 583569.2 | 707731.8 | 512908.8 | 599065.2 | 528366.0 | 661874.1 | 677171.1 | 595565.9 | 669216.1 | 545863.5 | 41233.1  | 479133.2 | 611245.0 | 568380.2 | 490038.8 | 580986.7 | 585419.8 | 619746.4 | 634811.4       | hsa-mir-10b    |
| hsa-mir-125a-5p   | 439.4    | 440.9    | 396.2    | 194.7    | 134.2    | 198.2    | 151.8    | 78.9     | 169.3    | 397.6    | 371.6    | 303.1    | 221.8    | 226.6    | 235.3    | 164.1    | 144.6    | 185.7    | 159.5    | 348.5    | 127.1    | 312.4    | 168.8    | 212.8    | 149.8    | 135.0    | 286.5    | 68.7     | 127.5          | hsa-mir-125a   |
| hsa-mir-125b-2-3p | 378.2    | 380.4    | 335.2    | 48.3     | 99.5     | 228.1    | 135.0    | 99.5     | 72.8     | 258.0    | 236.6    | 67.0     | 142.4    | 173.2    | 116.9    | 129.3    | 36.8     | 69.4     | 95.1     | 223.9    | 353.8    | 337.8    | 83.4     | 219.1    | 11.1     | 157.4    | 88.8     | 183.1    | 120.5          | hsa-mir-125b-2 |
| hsa-mir-1307-3p   | 276.0    | 624.1    | 326.2    | 255.3    | 211.8    | 459.7    | 281.5    | 249.5    | 231.4    | 235.8    | 240.9    | 90.1     | 308.1    | 72.0     | 194.8    | 85.7     | 186.0    | 109.5    | 85.6     | 393.3    | 285.2    | 290.6    | 249.5    | 296.4    | 340.5    | 172.1    | 174.3    | 92.9     | 124.5          | hsa-mir-1307   |
| hsa-mir-141-3p    | 159.0    | 320.3    | 142.7    | 71.1     | 153.8    | 79.2     | 239.1    | 280.6    | 137.5    | 149.0    | 208.6    | 146.6    | 215.5    | 130.0    | 152.3    | 197.7    | 153.0    | 259.3    | 94.6     | 223.9    | 257.3    | 294.7    | 63.5     | 168.6    | 506.6    | 174.4    | 384.4    | 117.6    | 217.1          | hsa-mir-141    |
| hsa-mir-146a-5p   | 61.2     | 162.9    | 108.6    | 17.6     | 67.2     | 82.9     | 73.2     | 132.4    | 25.5     | 28.4     | 33.0     | 48.1     | 115.9    | 26.3     | 221.5    | 206.5    | 78.8     | 75.2     | 46.3     | 40.3     | 129.1    | 176.2    | 81.4     | 30.0     | 2359.4   | 102.8    | 6545.0   | 322.7    | 147.8          | hsa-mir-146a   |
| hsa-mir-146b-5p   | 3154.2   | 2890.8   | 2731.8   | 2357.9   | 2527.0   | 2897.1   | 1820.5   | 2167.4   | 2321.1   | 2497.3   | 1768.4   | 1879.5   | 2477.6   | 2358.2   | 2200.5   | 2405.9   | 2081.8   | 2018.0   | 2042.4   | 2700.0   | 1293.3   | 2707.7   | 2249.1   | 1962.0   | 2176.0   | 1796.6   | 3811.5   | 1572.2   | 2471.9         | hsa-mir-146b   |
| hsa-mir-148a-5p   | 685.3    | 846.0    | 239.7    | 323.4    | 313.8    | 459.1    | 349.4    | 888.3    | 171.4    | 286.2    | 512.8    | 358.3    | 884.2    | 313.6    | 662.1    | 384.2    | 351.9    | 459.5    | 273.6    | 458.8    | 1184.6   | 621.4    | 232.5    | 554.0    | 593.0    | 308.3    | 181.2    | 519.8    | 553.1          | hsa-mir-148a   |
| hsa-mir-148a-3p   | 6773.7   | 9253.9   | 2980.2   | 2237.0   | 1649.4   | 2386.2   | 2288.5   | 3032.9   | 1268.5   | 3367.7   | 3984.6   | 2444.7   | 5834.8   | 2440.5   | 3524.7   | 2517.3   | 1388.8   | 1837.8   | 3860.6   | 3736.1   | 5662.8   | 5145.3   | 1928.8   | 3212.6   | 3530.4   | 1731.2   | 1182.3   | 1758.0   | 2699.0         | hsa-mir-148a   |
| hsa-mir-151a-3p   | 4205.0   | 4274.3   | 4187.2   | 2294.6   | 3323.0   | 5087.9   | 5075.8   | 3789.7   | 4475.2   | 3262.2   | 3671.5   | 2832.5   | 4211.6   | 4346.8   | 4670.4   | 4083.5   | 5102.5   | 5168.5   | 3602.1   | 3238.9   | 2421.9   | 3800.2   | 4108.3   | 4622.4   | 6428.4   | 4498.9   | 8018.5   | 3934.9   | 3980.2         | hsa-mir-151a   |
| hsa-mir-155-5p    | 413.5    | 1258.6   | 66.2     | 79.0     | 119.0    | 68.4     | 116.7    | 187.7    | 66.1     | 44.1     | 172.7    | 25.3     | 307.5    | 34.3     | 285.2    | 202.7    | 94.3     | 56.2     | 107.5    | 137.6    | 4582.9   | 138.4    | 29.9     | 174.9    | 690.8    | 77.0     | 224.1    | 317.4    | 296.0          | hsa-mir-155    |
| hsa-mir-181a-5p   | 11000.4  | 9702.2   | 15243.3  | 7930.0   | 7362.3   | 10382.9  | 10339.6  | 10286.1  | 6925.0   | 7027.5   | 13011.6  | 5636.0   | 6767.1   | 7624.3   | 9474.6   | 6133.7   | 8577.1   | 5411.7   | 7000.0   | 7323.5   | 1244.7   | 8026.3   | 6302.3   | 5914.6   | 9104.7   | 7044.9   | 9475.9   | 6372.2   | 4689.4         | hsa-mir-181a-1 |
| hsa-mir-181a-2-3p | 96.7     | 345.5    | 157.1    | 168.5    | 113.8    | 162.3    | 242.2    | 98.7     | 48.8     | 95.7     | 200.7    | 121.0    | 199.8    | 98.7     | 198.3    | 127.0    | 71.0     | 85.9     | 195.9    | 289.8    | 112.2    | 188.6    | 151.1    | 356.0    | 269.4    | 129.5    | 91.6     | 182.6    | 45.3           | hsa-mir-181a-2 |
| hsa-mir-181a-5p   | 1000.4   | 9702.2   | 15243.3  | 7930.0   | 7362.3   | 10382.9  | 10339.6  | 10286.1  | 6925.0   | 7027.5   | 13011.6  | 5636.0   | 6767.1   | 7624.3   | 9474.6   | 6133.7   | 8577.1   | 5411.7   | 7000.0   | 7323.5   | 1244.7   | 8026.3   | 6302.3   | 5914.6   | 9104.7   | 7044.9   | 9475.9   | 6372.2   | 4689.4         | hsa-mir-181a-2 |
| hsa-mir-181b-5p   | 914.9    | 1358.4   | 1280.6   | 683.1    | 1051.5   | 1070.0   | 810.9    | 1586.4   | 431.4    | 712.8    | 1149.0   | 568.0    | 1122.3   | 586.9    | 1052.0   | 482.6    | 821.4    | 516.0    | 625.7    | 804.3    | 402.9    | 813.4    | 560.4    | 791.4    | 700.4    | 804.1    | 588.4    | 353.3    | hsa-mir-181b-1 |                |
| hsa-mir-181b-5p   | 955.1    | 1377.5   |          |          |          |          |          |          |          |          |          |          |          |          |          |          |          |          |          |          |          |          |          |          |          |          |          |          |                |                |

|                  |         |         |         |         |        |        |        |        |        |         |         |        |         |        |        |        |        |        |        |         |         |         |        |        |        |        |        |        |        |               |             |
|------------------|---------|---------|---------|---------|--------|--------|--------|--------|--------|---------|---------|--------|---------|--------|--------|--------|--------|--------|--------|---------|---------|---------|--------|--------|--------|--------|--------|--------|--------|---------------|-------------|
| hsa-mir-30c-5p   | 685.5   | 909.7   | 555.6   | 197.3   | 385.8  | 621.2  | 308.9  | 507.8  | 451.0  | 307.8   | 97.0    | 70.1   | 374.6   | 304.9  | 627.9  | 253.4  | 225.4  | 289.9  | 235.6  | 399.2   | 1005.8  | 436.9   | 431.4  | 641.8  | 445.3  | 518.6  | 298.2  | 365.7  | 299.3  | hsa-mir-30c-1 |             |
| hsa-mir-30c-2-3p | 734.7   | 530.7   | 724.7   | 498.6   | 174.4  | 308.7  | 272.3  | 476.6  | 150.6  | 451.2   | 452.8   | 273.3  | 382.6   | 221.9  | 307.7  | 222.7  | 250.5  | 85.2   | 207.9  | 604.4   | 241.2   | 487.4   | 211.6  | 310.1  | 347.8  | 210.4  | 110.2  | 237.3  | 174.5  | hsa-mir-30c-2 |             |
| hsa-mir-30c-5p   | 685.5   | 909.7   | 555.6   | 197.3   | 385.8  | 621.2  | 308.9  | 507.8  | 451.0  | 307.8   | 97.0    | 70.1   | 374.6   | 304.9  | 627.9  | 253.4  | 225.4  | 289.9  | 235.6  | 399.2   | 1005.8  | 436.9   | 431.4  | 641.8  | 445.3  | 518.6  | 298.2  | 365.7  | 299.3  | hsa-mir-30c-2 |             |
| hsa-mir-30d-5p   | 5135.4  | 6379.9  | 4050.3  | 2957.5  | 3196.3 | 4974.0 | 3280.9 | 4073.8 | 3899.6 | 3987.1  | 2581.3  | 1598.3 | 4945.7  | 3930.5 | 4484.3 | 3387.9 | 2151.6 | 4295.2 | 1958.9 | 4348.3  | 5902.0  | 3863.6  | 4086.4 | 4654.0 | 4936.9 | 3974.0 | 3027.6 | 2776.7 | 3719.8 | hsa-mir-30d   |             |
| hsa-mir-30e-5p   | 1076.3  | 932.7   | 826.5   | 912.6   | 677.0  | 771.0  | 599.6  | 514.3  | 740.6  | 951.2   | 607.5   | 412.6  | 565.7   | 923.6  | 465.0  | 764.5  | 676.1  | 550.5  | 383.5  | 872.4   | 417.8   | 769.4   | 523.6  | 800.4  | 862.8  | 869.3  | 763.4  | 531.6  | 551.4  | hsa-mir-30e   |             |
| hsa-mir-30e-3p   | 1674.9  | 2171.1  | 1497.5  | 1879.1  | 2127.0 | 2891.4 | 2304.5 | 3183.7 | 1831.8 | 1658.4  | 1360.5  | 1091.7 | 2311.2  | 2280.7 | 1897.9 | 2248.9 | 1566.5 | 2064.8 | 1746.1 | 1855.4  | 1984.1  | 1584.2  | 2863.5 | 3241.4 | 3144.1 | 2320.5 | 1459.0 | 2302.0 | 1655.8 | hsa-mir-30e   |             |
| hsa-mir-320a     | 5998.0  | 6912.2  | 3887.4  | 2226.5  | 2494.1 | 4528.0 | 2935.7 | 5534.4 | 2412.4 | 2408.8  | 2756.6  | 1513.9 | 3336.7  | 2777.0 | 4018.1 | 2262.4 | 4533.6 | 3432.5 | 2981.4 | 3680.0  | 5938.1  | 3548.9  | 2816.4 | 3832.8 | 4087.3 | 3814.4 | 3535.9 | 2599.5 | 2468.2 | hsa-mir-320a  |             |
| hsa-mir-328-3p   | 190.3   | 295.2   | 102.8   | 70.0    | 69.2   | 141.3  | 142.3  | 89.5   | 138.6  | 52.4    | 35.2    | 55.7   | 70.0    | 41.1   | 81.4   | 43.3   | 85.5   | 108.8  | 45.1   | 168.0   | 92.6    | 183.1   | 119.8  | 104.7  | 121.4  | 114.0  | 41.7   | 126.2  | 46.6   | hsa-mir-328   |             |
| hsa-mir-375      | 9697.2  | 15119.7 | 189.9   | 1373.0  | 962.5  | 1847.9 | 2132.5 | 5413.4 | 1650.4 | 956.0   | 1763.0  | 971.3  | 12384.0 | 1363.1 | 4181.4 | 3037.9 | 614.1  | 3875.1 | 4156.3 | 1249.1  | 21208.7 | 3742.0  | 972.7  | 4343.1 | 6070.8 | 2075.1 | 508.6  | 3292.7 | 6037.6 | hsa-mir-375   |             |
| hsa-mir-378a-3p  | 1176.5  | 1500.3  | 1370.6  | 533.4   | 689.7  | 1126.2 | 1127.1 | 1294.8 | 677.4  | 538.9   | 634.5   | 406.7  | 1078.8  | 759.3  | 830.1  | 917.5  | 1545.9 | 847.5  | 755.1  | 446.8   | 562.9   | 727.5   | 1116.6 | 639.8  | 1034.8 | 627.1  | 1409.4 | 424.2  | 611.0  | hsa-mir-378a  |             |
| hsa-mir-423-3p   | 486.3   | 751.6   | 438.3   | 216.0   | 229.2  | 379.7  | 327.3  | 395.1  | 164.7  | 367.9   | 282.6   | 168.9  | 165.7   | 205.8  | 119.2  | 87.2   | 393.2  | 217.0  | 139.3  | 427.7   | 613.9   | 434.5   | 203.7  | 160.6  | 256.3  | 180.2  | 168.0  | 181.5  | 137.9  | hsa-mir-423   |             |
| hsa-mir-423-5p   | 2237.0  | 1889.5  | 2070.1  | 1511.1  | 1234.0 | 1824.8 | 1369.3 | 1333.0 | 1515.0 | 1886.2  | 1500.9  | 1194.5 | 1015.8  | 1502.4 | 1207.0 | 1052.7 | 1057.7 | 1178.2 | 822.8  | 1843.4  | 1244.7  | 1757.3  | 1185.8 | 1210.6 | 1514.7 | 1152.9 | 1087.0 | 858.6  | 1008.2 | hsa-mir-423   |             |
| hsa-mir-486-5p   | 1321.0  | 768.2   | 1696.4  | 2528.9  | 394.8  | 424.7  | 569.1  | 793.6  | 195.7  | 2038.2  | 1293.4  | 1130.9 | 272.9   | 1017.1 | 290.0  | 3114.7 | 428.1  | 429.1  | 772.8  | 1210.0  | 3031.8  | 2324.9  | 334.8  | 233.1  | 603.7  | 298.1  | 1606.3 | 319.0  | 597.7  | hsa-mir-486-1 |             |
| hsa-mir-486-5p   | 1325.1  | 774.4   | 1686.8  | 2493.7  | 394.8  | 424.9  | 569.1  | 793.6  | 196.0  | 2032.5  | 1307.4  | 1127.2 | 256.9   | 1017.6 | 290.0  | 3108.6 | 428.1  | 429.1  | 772.8  | 1217.6  | 3060.9  | 2324.9  | 325.4  | 228.8  | 604.1  | 294.4  | 1591.1 | 319.0  | 581.0  | hsa-mir-486-2 |             |
| hsa-mir-532-5p   | 664.0   | 944.0   | 523.5   | 337.6   | 110.4  | 110.5  | 71.7   | 183.3  | 103.2  | 469.0   | 708.4   | 311.3  | 209.2   | 129.6  | 98.8   | 108.1  | 45.9   | 31.6   | 31.4   | 772.4   | 714.3   | 418.4   | 96.1   | 118.4  | 71.1   | 127.2  | 51.7   | 44.0   | 132.5  | hsa-mir-532   |             |
| hsa-mir-574-5p   | 319.0   | 596.0   | 137.2   | 109.3   | 102.7  | 405.9  | 174.3  | 220.6  | 73.1   | 107.8   | 109.2   | 39.7   | 290.3   | 92.7   | 176.7  | 132.3  | 191.8  | 205.7  | 172.3  | 146.3   | 1027.0  | 245.1   | 123.7  | 212.2  | 449.1  | 143.5  | 141.9  | 174.5  | 159.2  | hsa-mir-574   |             |
| hsa-mir-577      | 144.5   | 145.3   | 101.2   | 141.9   | 109.1  | 147.8  | 185.4  | 263.5  | 126.6  | 258.3   | 263.9   | 181.5  | 44.6    | 316.3  | 23.2   | 172.7  | 140.8  | 121.7  | 53.3   | 180.5   | 31.4    | 129.8   | 96.4   | 51.9   | 131.8  | 86.9   | 96.9   | 54.2   | 80.9   | hsa-mir-577   |             |
| hsa-mir-660-5p   | 104.0   | 114.8   | 134.3   | 53.2    | 61.2   | 146.4  | 59.5   | 119.3  | 109.4  | 118.8   | 77.6    | 31.2   | 119.4   | 87.2   | 130.6  | 94.0   | 113.0  | 80.4   | 23.1   | 94.5    | 58.8    | 80.0    | 66.7   | 93.6   | 211.9  | 127.2  | 67.3   | 81.1   | 83.9   | hsa-mir-660   |             |
| hsa-mir-769-5p   | 112.0   | 142.9   | 100.9   | 138.9   | 125.9  | 72.9   | 149.1  | 222.3  | 91.3   | 100.7   | 95.9    | 69.2   | 229.8   | 174.0  | 149.5  | 101.4  | 164.0  | 202.1  | 46.3   | 94.0    | 236.1   | 88.3    | 101.3  | 118.7  | 121.7  | 83.9   | 59.6   | 43.5   | 84.6   | hsa-mir-769   |             |
| hsa-mir-9-5p     | 117.8   | 168.0   | 60.4    | 391.2   | 300.9  | 112.2  | 166.7  | 588.9  | 186.3  | 239.1   | 375.6   | 295.8  | 159.1   | 254.5  | 469.8  | 176.8  | 296.4  | 324.2  | 162.8  | 181.0   | 41.6    | 296.6   | 145.6  | 372.0  | 386.3  | 363.6  | 194.5  | 533.8  | 80.6   | hsa-mir-9-1   |             |
| hsa-mir-9-5p     | 117.8   | 168.0   | 60.4    | 391.2   | 300.9  | 112.2  | 166.7  | 588.9  | 186.3  | 239.1   | 375.6   | 295.8  | 159.1   | 254.5  | 469.8  | 176.8  | 296.4  | 324.2  | 162.8  | 181.0   | 41.6    | 296.6   | 145.6  | 372.0  | 386.3  | 363.6  | 194.5  | 533.8  | 80.6   | hsa-mir-9-2   |             |
| hsa-mir-92a-3p   | 18245.8 | 26609.6 | 14400.4 | 15437.1 | 1452.2 | 3132.7 | 1865.9 | 2337.5 | 1184.5 | 11876.4 | 16361.3 | 7054.8 | 4185.1  | 2184.2 | 2314.2 | 1926.5 | 813.0  | 904.7  | 815.4  | 13259.8 | 28994.4 | 13359.0 | 1730.0 | 2754.2 | 2615.0 | 1340.2 | 1059.7 | 718.5  | 1468.4 | hsa-mir-92a-1 |             |
| hsa-mir-92a-3p   | 18857.4 | 27672.0 | 14700.8 | 15841.7 | 1528.9 | 3290.2 | 1914.3 | 2656.3 | 1267.0 | 12136.2 | 16569.2 | 7085.7 | 4459.8  | 2327.3 | 2431.4 | 2033.5 | 813.0  | 950.9  | 818.3  | 13487.9 | 30830.6 | 13833.2 | 1831.1 | 2864.0 | 2853.9 | 1417.1 | 1106.1 | 739.4  | 1618.2 | hsa-mir-92a-2 |             |
| hsa-mir-92b-3p   | 555.2   | 544.7   | 547.6   | 174.4   | 456.2  | 421.0  | 578.6  | 570.5  | 633.8  | 595.5   | 322.1   | 272.4  | 288.6   | 561.5  | 664.9  | 553.3  | 223.4  | 639.3  | 140.5  | 772.0   | 22.4    | 27.4    | 388.8  | 546.5  | 671.8  | 178.3  | 378.3  | 600.9  | 470.6  | 173.3         | hsa-mir-92b |
| hsa-mir-93-5p    | 190.7   | 529.7   | 170.0   | 147.5   | 65.7   | 107.7  | 247.5  | 197.3  | 109.1  | 71.7    | 88.3    | 51.8   | 239.2   | 80.5   | 155.4  | 130.2  | 98.8   | 135.0  | 47.9   | 108.4   | 700.6   | 140.8   | 117.5  | 145.2  | 153.3  | 148.6  | 212.9  | 79.5   | 87.2   | hsa-mir-93    |             |
| hsa-mir-9-5p     | 117.8   | 168.0   | 60.4    | 391.2   | 300.9  | 112.2  | 166.7  | 588.9  | 186.3  | 239.1   | 375.6   | 295.8  | 159.1   | 254.5  | 469.8  | 176.8  | 296.4  | 324.2  | 162.8  | 181.0   | 41.6    | 296.6   | 145.6  | 372.0  | 386.3  | 363.6  | 194.5  | 533.8  | 80.6   | hsa-mir-9-3   |             |
| hsa-mir-941      | 190.9   | 325.7   | 129.2   | 181.6   | 152.3  | 317.9  | 85.4   | 211.8  | 127.2  | 157.3   | 105.2   | 190.0  | 309.1   | 152.0  | 157.4  | 202.4  | 166.6  | 177.9  | 223.6  | 331.1   | 248.7   | 150.1   | 139.9  | 86.2   | 479.6  | 256.7  | 225.7  | 165.4  | 197.1  | hsa-mir-941-1 |             |
| hsa-mir-941      | 190.9   | 325.7   | 129.2   | 181.6   | 152.3  | 317.9  | 85.4   | 211.8  | 127.2  | 157.3   | 105.2   | 190.0  | 309.1   | 152.0  | 157.4  | 202.4  | 166.6  | 177.9  | 223.6  | 331.1   | 248.7   | 150.1   | 139.9  | 86.2   | 479.6  | 256.7  | 225.7  | 165.4  | 197.1  | hsa-mir-941-2 |             |
| hsa-mir-941      | 190.9   | 325.7   | 129.2   | 181.6   | 152.3  | 317.9  | 85.4   | 211.8  | 127.2  | 157.3   | 105.2   | 190.0  | 309.1   | 152.0  | 157.4  | 202.4  | 166.6  | 177.9  | 223.6  | 331.1   | 248.7   | 150.1   | 139.9  | 86.2   | 479.6  | 256.7  | 225.7  | 165.4  | 197.1  | hsa-mir-941-3 |             |
| hsa-mir-941      | 190.9   | 325.7   | 129.2   | 181.6   | 152.3  | 317.9  | 85.4   | 211.8  | 127.2  | 157.3   | 105.2   | 190.0  | 309.1   | 152.0  | 157.4  | 202.4  | 166.6  | 177.9  | 223.6  | 331.1   | 248.7   | 150.1   | 139.9  | 86.2   | 479.6  | 256.7  | 225.7  | 165.4  | 197.1  | hsa-mir-941-4 |             |
| hsa-mir-941      | 190.9   | 325.7   | 129.2   | 181.6   | 152.3  | 317.9  | 85.4   | 211.8  | 127.2  | 157.3   | 105.2   | 190.0  | 309.1   | 152.0  | 157.4  | 202.4  | 166.6  | 177.9  | 223.6  | 331.1   | 248.7   | 150.1   | 139.9  | 86.2   | 479.6  | 256.7  | 225.7  | 165.4  | 197.1  | hsa-mir-941-5 |             |
| hsa-mir-98-5p    | 979.6   | 1729.0  | 702.5   | 565.6   | 551.8  | 1290.5 | 916.9  | 1214.1 | 448.7  | 408.8   | 450.3   | 297.2  | 640.2   | 439.1  | 771.1  | 578.9  | 324.2  | 661.6  | 564.1  | 484.5   | 1793.1  | 820.1   | 833.5  | 715.7  | 1597.9 | 840.5  | 643.9  | 474.1  | 736.5  | hsa-mir-98    |             |
| hsa-mir-99a-5p   | 472.9   | 396.4   | 292.4   | 271.4   | 209.2  | 221.3  | 116.0  | 360.9  | 207.1  | 359.1   | 398.2   | 266.5  | 222.8   | 229.0  | 277.0  | 303.3  | 223.0  | 332.6  | 281.5  | 325.0   | 448.0   | 495.8   | 251.7  | 214.8  | 143.6  | 301.8  | 176.1  | 249.2  | 160.5  | hsa-mir-99a   |             |
| hsa-mir-99b-5p   | 4929.5  | 2946.3  | 5716.2  | 3831.6  | 3525.3 | 3780.9 | 4040.7 | 2860.6 | 2756.9 | 5419.5  | 4861.1  | 4259.1 | 2612.3  | 3957.2 | 3668.7 | 2886.4 | 4189.5 | 3296.5 | 2839.6 | 5362.5  | 817.5   | 4631.6  | 3279.5 | 3233.1 | 3247.8 | 2969.5 | 5258.1 | 2955.5 | 3125.8 | hsa-mir-99b   |             |
| hsa-mir-148b-3p  | 229.4   | 366.4   | 105.1   | 289.4   | 56.3   | 160.9  | 98.4   | 288.1  | 38.0   | 137.8   | 345.8   | 126.4  | 136.5   | 81.7   | 57.4   | 64.5   | 0.0    | 43.6   | 59.5   | 147.3   | 833.6   | 374.2   | 129.0  | 150.1  | 157.1  | 67.0   | 75.0   | 133.7  | 101.2  | hsa-mir-148b  |             |
| hsa-mir-31-5p    | 69.2    | 163.1   | 74.2    | 6.0     | 38.2   | 105.7  | 268.5  | 184.2  | 92.4   | 119.4   | 104.5   | 82.8   | 129.2   | 135.5  | 298.2  | 124.0  | 54.2   | 220.5  | 186.8  | 113.3   | 53.0    | 109.9   | 100.8  | 207.1  | 1035.8 | 188.0  | 781.8  | 76.8   | 96.6   | hsa-mir-31    |             |
| hsa-mir-425-5p   | 102.8   | 127.1   | 96.1    | 32.9    | 9.5    | 60.4   | 72.1   | 104.4  | 72.8   | 22.8    | 74.7    | 39.7   | 77.6    | 45.7   | 42.5   | 19.7   | 118.2  | 80.7   | 17.8   | 18.9    | 67.9    | 76.1    | 79.9   | 88.2   | 95.7   | 35.3   | 166.1  | 56.4   | 84.2   | hsa-mir-425   |             |
| hsa-mir-140-3p   | 260.1   | 403.6   | 325.5   | 207.0   | 68.1   | 115.6  | 8.4    | 163.6  | 25.2   | 155.2   | 195.7   | 93.2   | 125.3   | 100.4  | 168.4  | 58.9   | 41.3   | 21.6   | 21.5   | 189.0   | 576.6   |         |        |        |        |        |        |        |        |               |             |

|                  |       |       |       |       |      |      |       |       |      |       |       |       |      |      |      |      |      |      |      |       |       |       |      |      |      |      |      |      |             |                |             |
|------------------|-------|-------|-------|-------|------|------|-------|-------|------|-------|-------|-------|------|------|------|------|------|------|------|-------|-------|-------|------|------|------|------|------|------|-------------|----------------|-------------|
| hsa-mir-130a-3p  | 56.2  | 49.7  | 103.2 | 0.0   | 83.6 | 13.1 | 33.2  | 0.0   | 36.9 | 50.1  | 29.4  | 8.7   | 42.1 | 42.4 | 0.0  | 17.1 | 0.0  | 24.5 | 24.0 | 27.8  | 0.0   | 16.8  | 4.0  | 16.8 | 46.5 | 29.0 | 31.2 | 27.4 | 47.3        | hsa-mir-130a   |             |
| hsa-mir-184      | 152.0 | 62.3  | 168.4 | 110.4 | 31.1 | 52.4 | 16.8  | 56.6  | 0.0  | 80.3  | 27.7  | 92.0  | 19.2 | 59.3 | 27.5 | 43.3 | 0.0  | 25.8 | 0.0  | 32.8  | 9.8   | 52.4  | 53.8 | 0.0  | 19.1 | 7.8  | 34.7 | 69.8 | 3.0         | hsa-mir-184    |             |
| hsa-mir-19b-3p   | 27.5  | 72.2  | 7.4   | 34.1  | 31.4 | 36.2 | 29.4  | 25.0  | 22.2 | 10.4  | 40.6  | 12.7  | 45.6 | 0.0  | 50.4 | 29.5 | 0.0  | 36.5 | 20.7 | 32.8  | 125.1 | 6.0   | 0.0  | 9.1  | 14.6 | 22.6 | 33.1 | 43.0 | 8.7         | hsa-mir-19b-1  |             |
| hsa-mir-19b-3p   | 27.5  | 72.2  | 7.4   | 34.1  | 31.4 | 36.2 | 29.4  | 25.0  | 22.2 | 10.4  | 40.6  | 12.7  | 45.6 | 0.0  | 50.4 | 29.5 | 0.0  | 36.5 | 20.7 | 32.8  | 125.1 | 6.0   | 0.0  | 9.1  | 14.6 | 22.6 | 33.1 | 43.0 | 8.7         | hsa-mir-19b-2  |             |
| hsa-mir-429      | 35.3  | 141.5 | 26.7  | 32.9  | 9.0  | 37.0 | 19.8  | 133.3 | 14.0 | 67.3  | 0.0   | 23.6  | 0.0  | 22.0 | 33.8 | 11.8 | 0.0  | 73.9 | 0.0  | 0.0   | 138.1 | 40.9  | 26.6 | 40.2 | 81.5 | 48.8 | 51.7 | 0.0  | 19.3        | hsa-mir-429    |             |
| hsa-mir-92b-5p   | 15.3  | 25.1  | 18.0  | 0.0   | 23.2 | 20.2 | 0.0   | 20.2  | 11.4 | 37.9  | 33.0  | 6.2   | 11.8 | 14.4 | 0.4  | 15.3 | 82.0 | 25.2 | 0.0  | 9.0   | 3.1   | 14.8  | 14.2 | 19.7 | 69.0 | 34.6 | 21.9 | 25.2 | 42.0        | hsa-mir-92b    |             |
| hsa-mir-342-3p   | 39.1  | 52.1  | 64.3  | 18.0  | 45.3 | 22.8 | 0.0   | 0.0   | 25.5 | 37.9  | 107.7 | 38.3  | 23.3 | 20.3 | 0.0  | 27.5 | 0.3  | 0.0  | 0.0  | 21.9  | 31.6  | 64.7  | 20.4 | 51.8 | 21.7 | 24.6 | 9.5  | 8.9  | 25.2        | 13.0           | hsa-mir-342 |
| hsa-mir-500a-3p  | 138.9 | 204.0 | 20.0  | 102.2 | 15.0 | 10.8 | 16.0  | 0.0   | 0.0  | 200.9 | 265.7 | 252.2 | 14.3 | 15.7 | 40.9 | 27.1 | 0.0  | 0.3  | 18.6 | 184.5 | 82.4  | 201.6 | 0.0  | 21.1 | 15.6 | 17.7 | 0.0  | 0.5  | 7.0         | hsa-mir-500a   |             |
| hsa-mir-181a-3p  | 14.8  | 37.5  | 30.9  | 21.3  | 9.2  | 15.7 | 0.0   | 0.0   | 12.3 | 21.6  | 23.3  | 15.2  | 0.0  | 25.0 | 55.1 | 12.4 | 0.0  | 20.7 | 41.3 | 0.0   | 11.4  | 27.1  | 31.6 | 11.1 | 3.5  | 9.2  | 31.5 | 20.4 | 8.7         | hsa-mir-181a-1 |             |
| hsa-mir-320b     | 28.1  | 43.9  | 30.5  | 35.9  | 30.1 | 13.4 | 38.1  | 28.9  | 2.3  | 2.1   | 18.7  | 26.2  | 2.8  | 2.5  | 17.3 | 3.0  | 7.1  | 21.6 | 28.1 | 17.2  | 24.7  | 12.5  | 3.5  | 28.8 | 57.9 | 16.6 | 12.8 | 3.8  | 5.0         | hsa-mir-320b-2 |             |
| hsa-mir-361-5p   | 30.9  | 50.9  | 18.0  | 19.1  | 20.6 | 16.2 | 0.0   | 75.4  | 0.0  | 0.0   | 0.0   | 0.0   | 15.0 | 8.9  | 27.5 | 0.0  | 0.0  | 54.6 | 19.4 | 5.4   | 10.6  | 31.1  | 13.7 | 21.7 | 70.7 | 16.6 | 73.6 | 0.0  | 39.6        | hsa-mir-361    |             |
| hsa-mir-424-3p   | 28.3  | 37.5  | 66.2  | 10.9  | 45.1 | 71.5 | 38.9  | 81.6  | 0.0  | 13.0  | 24.4  | 0.0   | 0.0  | 13.1 | 0.0  | 0.3  | 22.0 | 58.4 | 34.7 | 0.0   | 4.7   | 18.9  | 58.0 | 39.1 | 20.5 | 11.1 | 0.0  | 0.0  | 43.6        | hsa-mir-424    |             |
| hsa-mir-92a-1-5p | 45.4  | 73.8  | 18.3  | 37.8  | 27.7 | 81.7 | 0.0   | 44.7  | 34.2 | 0.0   | 0.0   | 13.2  | 75.2 | 13.1 | 2.8  | 26.8 | 0.0  | 16.8 | 20.7 | 0.0   | 106.3 | 6.9   | 0.3  | 30.2 | 26.4 | 17.5 | 0.0  | 24.7 | 63.6        | hsa-mir-92a-1  |             |
| hsa-mir-320b     | 28.1  | 62.3  | 30.5  | 35.9  | 30.1 | 3.4  | 37.8  | 28.5  | 2.3  | 2.1   | 34.1  | 26.2  | 3.1  | 2.5  | 17.3 | 2.7  | 7.1  | 21.0 | 27.7 | 17.4  | 32.2  | 2.9   | 3.5  | 28.8 | 30.9 | 20.3 | 15.4 | 3.8  | 15.0        | hsa-mir-320b-1 |             |
| hsa-mir-345-5p   | 69.2  | 83.6  | 26.0  | 0.0   | 24.1 | 28.2 | 2.7   | 0.0   | 0.0  | 70.2  | 48.1  | 11.5  | 55.4 | 12.3 | 8.7  | 0.0  | 0.0  | 0.0  | 0.0  | 65.3  | 96.9  | 26.8  | 30.9 | 14.8 | 40.9 | 25.1 | 18.6 | 0.0  | 12.7        | hsa-mir-345    |             |
| hsa-mir-584-5p   | 25.9  | 110.6 | 53.7  | 16.8  | 4.9  | 41.6 | 117.9 | 32.0  | 0.0  | 40.3  | 27.7  | 0.0   | 16.7 | 0.4  | 34.2 | 35.7 | 0.0  | 0.0  | 19.8 | 10.6  | 4.3   | 69.7  | 12.7 | 1.7  | 45.4 | 18.2 | 20.3 | 0.0  | 8.0         | hsa-mir-584    |             |
| hsa-mir-671-3p   | 55.4  | 45.9  | 0.0   | 0.0   | 17.4 | 38.9 | 21.1  | 5.6   | 32.0 | 26.2  | 0.0   | 11.8  | 16.1 | 9.8  | 0.0  | 40.7 | 4.8  | 19.4 | 15.1 | 85.9  | 46.0  | 20.9  | 10.0 | 19.8 | 15.2 | 24.9 | 0.0  | 23.6 | hsa-mir-671 |                |             |
| hsa-mir-1226-5p  | 22.5  | 33.7  | 10.6  | 71.9  | 12.5 | 0.0  | 19.8  | 0.0   | 0.0  | 9.8   | 22.6  | 22.2  | 0.0  | 25.4 | 13.0 | 14.4 | 0.0  | 13.9 | 0.0  | 9.4   | 16.5  | 19.6  | 23.2 | 0.0  | 34.7 | 0.0  | 15.1 | 0.0  | 33.3        | hsa-mir-1226   |             |
| hsa-mir-1270     | 16.5  | 17.6  | 0.0   | 0.0   | 17.2 | 38.7 | 0.0   | 28.9  | 0.0  | 0.0   | 0.0   | 25.9  | 23.7 | 35.2 | 9.4  | 31.2 | 42.6 | 14.2 | 0.0  | 23.8  | 34.1  | 14.1  | 6.0  | 0.0  | 66.9 | 44.9 | 7.2  | 14.0 | 19.6        | hsa-mir-1270   |             |
| hsa-mir-218-5p   | 10.6  | 13.8  | 6.4   | 44.2  | 12.7 | 38.2 | 0.0   | 20.2  | 9.1  | 20.1  | 12.2  | 0.0   | 0.0  | 13.1 | 15.3 | 9.7  | 0.0  | 14.9 | 0.0  | 13.7  | 11.8  | 0.0   | 48.6 | 22.8 | 0.0  | 15.9 | 12.8 | 0.0  | 19.0        | hsa-mir-218-1  |             |
| hsa-mir-218-5p   | 10.6  | 13.8  | 6.4   | 44.2  | 12.7 | 38.2 | 0.0   | 20.2  | 9.1  | 20.1  | 12.2  | 0.0   | 0.0  | 13.1 | 15.3 | 9.7  | 0.0  | 14.9 | 0.0  | 13.7  | 11.8  | 0.0   | 48.6 | 22.8 | 0.0  | 15.9 | 12.8 | 0.0  | 19.0        | hsa-mir-218-2  |             |
| hsa-mir-29a-3p   | 15.1  | 34.9  | 8.4   | 0.0   | 12.0 | 39.9 | 24.0  | 31.1  | 0.0  | 19.6  | 15.4  | 24.5  | 0.0  | 23.7 | 0.0  | 0.3  | 0.0  | 12.9 | 0.0  | 44.5  | 43.2  | 9.6   | 0.3  | 28.5 | 48.6 | 16.1 | 19.8 | 0.5  | 16.0        | hsa-mir-29a    |             |
| hsa-mir-342-5p   | 41.9  | 64.9  | 51.4  | 32.2  | 0.0  | 49.8 | 0.0   | 0.0   | 30.1 | 0.0   | 29.1  | 0.0   | 0.0  | 31.3 | 0.0  | 0.0  | 0.0  | 24.2 | 0.0  | 0.0   | 35.7  | 26.6  | 10.5 | 20.8 | 16.0 | 16.4 | 12.4 | 39.7 | 5.0         | hsa-mir-342    |             |
| hsa-mir-1468-5p  | 23.9  | 17.2  | 11.9  | 16.8  | 0.0  | 0.0  | 0.0   | 0.0   | 0.0  | 0.3   | 11.9  | 11.5  | 21.2 | 34.7 | 14.6 | 3.0  | 0.0  | 11.3 | 0.0  | 22.2  | 18.8  | 23.2  | 0.3  | 28.5 | 20.5 | 13.4 | 0.0  | 0.0  | 10.3        | hsa-mir-1468   |             |
| hsa-mir-29c-3p   | 22.1  | 23.5  | 11.9  | 18.3  | 2.2  | 28.8 | 22.1  | 11.0  | 24.6 | 8.9   | 0.0   | 14.4  | 14.6 | 12.7 | 0.0  | 12.4 | 0.0  | 0.0  | 0.0  | 16.0  | 7.9   | 28.7  | 0.0  | 0.6  | 44.4 | 5.1  | 21.0 | 0.0  | 0.0         | hsa-mir-29c    |             |
| hsa-mir-324-5p   | 19.3  | 28.9  | 0.0   | 0.0   | 0.0  | 23.4 | 0.0   | 0.0   | 0.0  | 18.1  | 13.6  | 0.0   | 43.5 | 0.0  | 11.0 | 13.0 | 0.0  | 11.0 | 12.8 | 0.0   | 44.7  | 16.0  | 0.0  | 33.4 | 21.9 | 15.2 | 26.1 | 0.0  | 0.0         | hsa-mir-324    |             |
| hsa-mir-365b-5p  | 16.9  | 27.3  | 25.4  | 15.4  | 10.7 | 30.2 | 29.4  | 18.0  | 0.0  | 0.0   | 13.3  | 13.0  | 11.1 | 5.1  | 0.0  | 24.5 | 0.0  | 0.0  | 0.0  | 6.6   | 4.3   | 43.6  | 0.0  | 0.0  | 18.4 | 10.8 | 0.0  | 4.8  | 33.3        | hsa-mir-365b   |             |
| hsa-mir-432-5p   | 9.0   | 101.4 | 100.3 | 0.0   | 0.0  | 72.6 | 42.3  | 63.1  | 10.8 | 0.0   | 0.0   | 34.6  | 27.9 | 0.0  | 0.0  | 34.2 | 54.2 | 0.0  | 2.1  | 15.3  | 47.5  | 17.0  | 14.7 | 9.4  | 27.4 | 2.5  | 6.3  | 52.1 | 0.0         | hsa-mir-432    |             |
| hsa-mir-99a-3p   | 19.9  | 26.9  | 27.0  | 0.0   | 0.0  | 8.5  | 28.6  | 21.5  | 0.0  | 20.1  | 20.8  | 0.0   | 17.8 | 14.4 | 0.0  | 0.0  | 0.0  | 20.0 | 22.7 | 22.2  | 52.6  | 22.0  | 13.7 | 0.0  | 0.0  | 12.9 | 0.0  | 0.0  | 0.0         | hsa-mir-99a    |             |
| hsa-mir-10b-3p   | 32.3  | 8.2   | 19.0  | 40.8  | 18.3 | 19.9 | 18.3  | 0.0   | 58.8 | 14.8  | 13.6  | 0.0   | 0.0  | 0.4  | 15.0 | 30.9 | 0.0  | 13.2 | 0.0  | 11.1  | 3.1   | 8.6   | 0.0  | 0.0  | 0.0  | 2.8  | 19.3 | 0.0  | 52.6        | hsa-mir-10b    |             |
| hsa-mir-194-5p   | 49.4  | 33.5  | 29.6  | 0.0   | 0.0  | 20.8 | 0.0   | 57.4  | 24.9 | 13.9  | 19.0  | 0.0   | 0.0  | 0.0  | 30.7 | 29.5 | 0.0  | 11.0 | 0.0  | 0.5   | 10.2  | 6.9   | 28.6 | 10.8 | 0.0  | 6.9  | 16.5 | 0.0  | 0.0         | hsa-mir-194-2  |             |
| hsa-mir-197-3p   | 15.3  | 36.3  | 14.5  | 0.0   | 6.4  | 17.4 | 18.3  | 14.0  | 9.4  | 25.8  | 11.1  | 0.0   | 32.7 | 0.0  | 0.0  | 0.0  | 0.0  | 0.0  | 0.0  | 25.9  | 0.2   | 34.4  | 24.0 | 20.5 | 13.6 | 18.9 | 0.0  | 0.0  | 0.0         | hsa-mir-197    |             |
| hsa-mir-132-3p   | 23.9  | 58.5  | 17.0  | 17.6  | 0.0  | 0.0  | 0.0   | 25.9  | 0.0  | 7.4   | 12.6  | 0.0   | 22.3 | 0.0  | 13.8 | 0.0  | 0.7  | 12.9 | 64.1 | 0.0   | 74.1  | 0.0   | 0.0  | 26.2 | 0.0  | 10.1 | 14.0 | 0.0  | 0.7         | hsa-mir-132    |             |
| hsa-mir-146b-3p  | 7.6   | 10.0  | 0.0   | 0.0   | 0.0  | 33.3 | 20.6  | 0.0   | 0.0  | 9.8   | 0.0   | 0.0   | 15.0 | 11.0 | 18.1 | 15.3 | 49.1 | 0.0  | 15.7 | 15.8  | 9.0   | 11.0  | 14.7 | 0.0  | 0.0  | 6.5  | 17.0 | 24.7 | 0.0         | hsa-mir-146b   |             |
| hsa-mir-194-5p   | 49.2  | 33.3  | 28.9  | 0.0   | 0.0  | 20.8 | 0.0   | 57.4  | 24.9 | 25.5  | 28.0  | 0.0   | 0.0  | 0.0  | 30.7 | 18.6 | 0.0  | 11.0 | 0.0  | 0.5   | 3.5   | 6.9   | 28.6 | 10.8 | 0.0  | 6.9  | 16.5 | 0.0  | 0.0         | hsa-mir-194-1  |             |
| hsa-mir-365a-5p  | 19.1  | 14.6  | 0.0   | 18.7  | 20.2 | 0.0  | 19.5  | 69.0  | 0.0  | 0.0   | 0.0   | 0.0   | 11.8 | 0.0  | 11.4 | 0.0  | 0.0  | 11.6 | 0.0  | 6.8   | 0.0   | 7.4   | 20.9 | 25.4 | 26.0 | 2.3  | 12.8 | 0.0  | 10.7        | hsa-mir-365a   |             |
| hsa-mir-484      | 27.5  | 28.9  | 15.1  | 0.0   | 15.5 | 17.7 | 0.0   | 37.3  | 9.9  | 9.8   | 12.9  | 13.2  | 0.0  | 0.0  | 12.6 | 13.3 | 0.0  | 41.7 | 0.0  | 0.0   | 28.2  | 6.5   | 0.0  | 0.0  | 0.0  | 8.1  | 22.8 | 0.0  | 11.0        | hsa-mir-484    |             |
| hsa-mir-128-3p   | 6.6   | 5.8   | 11.6  | 13.1  | 27.1 | 13.4 | 0.0   | 68.4  | 5.6  | 0.0   | 0.0   | 31.8  | 23.3 | 36.0 | 0.0  | 0.0  | 0.0  | 0.0  | 0.0  | 0.0   | 39.2  | 4.8   | 13.7 | 0.0  | 23.6 | 15.4 | 0.0  | 30.6 | 0.0         | hsa-mir-128-1  |             |
| hsa-mir-27b-5p   | 21.1  | 17.2  | 0.0   | 0.0   | 24.5 | 0.0  | 0.0   | 0.0   | 0.0  | 12.2  | 16.2  | 0.0   | 12.5 | 0.0  | 18.9 | 10.3 | 0.0  | 28.4 | 0.0  | 17.2  | 16.9  | 0.0   | 14.4 | 0.0  | 0.0  | 13.4 | 2.1  | 0.0  | 6.0         | hsa-mir-27b    |             |
| hsa-mir-589-5p   | 13.8  | 25.5  | 9.0   | 20.2  | 0.0  | 0.0  | 6.1   | 19.7  | 0.0  | 19.9  | 14.4  | 25.3  | 0.0  | 18.6 | 0.0  | 0.0  | 0.0  | 0.0  | 0.0  | 25.0  | 21.2  | 48.4  | 0.0  | 11.7 | 0.0  | 9.0  | 14.0 | 0.0  | 9.7         | hsa-mir-589    |             |
| hsa-mir-125b-5p  | 9.6   | 10.6  | 6.8   | 0.0   | 17.2 | 0.3  | 0.0   | 40.3  | 9.4  | 0.0   | 0.0   | 9.6   | 0.4  | 19.9 | 9.8  | 11.8 | 0.0  | 13.2 | 15.3 | 0.0   | 5.1   | 7.9   | 35.4 | 15.4 | 0.4  | 11.3 | 10.0 | 0.0  | 13.0        | hsa-mir-125b-1 |             |
| hsa-mir-125b-5p  | 9.6   | 10.6  | 6.8   | 0.0   | 17.2 | 0.3  | 0.0   | 40.3  | 9.4  | 0.0   | 0.0   | 9.6   | 0.4  | 19.9 | 9.8  | 11.8 | 0.0  | 13.2 | 15.3 | 0.0   | 5.1   | 7.9   | 35.4 | 15.4 | 0.4  | 11.3 | 10.0 | 0.0  | 13.0        | hsa-mir-125b-2 |             |
| hsa-mir-128-3p   | 6.6   | 5.8   | 11.6  | 0.0   | 40.0 | 13.4 | 0.0   | 68.4  | 0.0  | 0.0   | 0.0   | 31.8  | 11.5 | 36.0 | 0.0  | 0.0  | 0.0  | 0.0  | 0.0  | 8.0   | 38.8  | 4.8   | 13.4 | 0.0  | 23.6 | 15.4 | 0.0  | 18.3 | 0.0         | hsa-mir-128-2  |             |
| hsa-mir-181c-3p  | 0.2   | 5.0   | 0.0   | 18.0  | 14.0 | 20.5 | 0.0   | 0.0   | 0.0  | 0.0   |       |       |      |      |      |      |      |      |      |       |       |       |      |      |      |      |      |      |             |                |             |

|                   |      |      |      |      |      |      |      |      |      |      |      |      |      |      |      |      |      |      |       |      |      |      |      |      |      |      |      |      |            |             |                |                |               |
|-------------------|------|------|------|------|------|------|------|------|------|------|------|------|------|------|------|------|------|------|-------|------|------|------|------|------|------|------|------|------|------------|-------------|----------------|----------------|---------------|
| hsa-miR-17-5p     | 11.8 | 17.4 | 19.3 | 0.0  | 0.0  | 0.0  | 0.0  | 0.0  | 0.0  | 24.3 | 0.0  | 0.0  | 10.8 | 0.0  | 0.0  | 0.0  | 14.2 | 0.0  | 1.7   | 40.4 | 8.9  | 7.5  | 14.3 | 19.4 | 7.6  | 3.5  | 0.0  | 0.0  | hsa-mir-17 |             |                |                |               |
| hsa-miR-20b-5p    | 15.3 | 14.4 | 0.0  | 0.0  | 0.0  | 0.0  | 0.0  | 0.0  | 0.0  | 0.0  | 0.0  | 0.0  | 16.0 | 0.0  | 0.0  | 16.2 | 0.0  | 0.0  | 24.8  | 0.0  | 58.1 | 0.0  | 0.0  | 19.1 | 0.0  | 0.0  | 12.6 | 0.5  | 13.0       | hsa-mir-20b |                |                |               |
| hsa-miR-30c-1-3p  | 9.4  | 11.2 | 18.0 | 0.8  | 15.9 | 0.3  | 0.4  | 0.0  | 0.4  | 9.4  | 9.5  | 0.0  | 0.0  | 40.0 | 0.0  | 12.2 | 0.0  | 0.0  | 10.0  | 0.0  | 1.2  | 6.3  | 7.9  | 4.2  | 11.4 | 0.0  | 9.5  | 4.2  | 14.0       | 21.0        | hsa-mir-30c-1  |                |               |
| hsa-miR-542-3p    | 17.7 | 0.0  | 24.1 | 0.0  | 24.1 | 0.0  | 0.0  | 0.0  | 0.0  | 0.0  | 0.3  | 0.0  | 0.0  | 0.0  | 0.0  | 11.4 | 28.9 | 0.0  | 0.0   | 0.0  | 8.7  | 0.0  | 0.0  | 13.7 | 11.7 | 23.6 | 0.0  | 19.8 | 0.0        | 0.0         | hsa-mir-542    |                |               |
| hsa-miR-642a-5p   | 5.4  | 4.8  | 12.9 | 19.8 | 0.0  | 0.0  | 0.0  | 0.0  | 3.5  | 18.7 | 0.6  | 12.6 | 0.0  | 12.2 | 61.4 | 0.0  | 0.0  | 0.0  | 12.6  | 0.0  | 0.0  | 5.5  | 0.0  | 2.0  | 0.0  | 0.0  | 6.2  | 11.2 | 20.9       | 9.3         | hsa-mir-642a   |                |               |
| hsa-miR-6859-5p   | 13.6 | 3.2  | 0.0  | 31.4 | 16.3 | 0.0  | 0.0  | 0.0  | 0.0  | 23.7 | 13.6 | 0.0  | 0.0  | 0.0  | 0.0  | 12.1 | 0.0  | 0.0  | 19.8  | 8.3  | 0.0  | 30.4 | 0.0  | 5.1  | 0.0  | 5.1  | 2.8  | 21.5 | 0.0        | 0.0         | hsa-mir-6859-1 |                |               |
| hsa-miR-6859-5p   | 13.6 | 3.2  | 0.0  | 31.4 | 16.3 | 0.0  | 0.0  | 0.0  | 0.0  | 23.7 | 13.6 | 0.0  | 0.0  | 0.0  | 0.0  | 12.1 | 0.0  | 0.0  | 19.8  | 8.3  | 0.0  | 30.4 | 0.0  | 5.1  | 0.0  | 5.1  | 2.8  | 21.5 | 0.0        | 0.0         | hsa-mir-6859-2 |                |               |
| hsa-miR-6859-5p   | 13.6 | 3.2  | 0.0  | 31.4 | 16.3 | 0.0  | 0.0  | 0.0  | 0.0  | 23.7 | 13.6 | 0.0  | 0.0  | 0.0  | 0.0  | 12.1 | 0.0  | 0.0  | 19.8  | 8.3  | 0.0  | 30.4 | 0.0  | 5.1  | 0.0  | 5.1  | 2.8  | 21.5 | 0.0        | 0.0         | hsa-mir-6859-3 |                |               |
| hsa-miR-6859-5p   | 13.6 | 3.2  | 0.0  | 31.4 | 16.3 | 0.0  | 0.0  | 0.0  | 0.0  | 23.7 | 13.6 | 0.0  | 0.0  | 0.0  | 0.0  | 12.1 | 0.0  | 0.0  | 19.8  | 8.3  | 0.0  | 30.4 | 0.0  | 5.1  | 0.0  | 5.1  | 2.8  | 21.5 | 0.0        | 0.0         | hsa-mir-6859-4 |                |               |
| hsa-miR-877-5p    | 11.2 | 24.9 | 26.7 | 35.6 | 0.0  | 0.0  | 0.0  | 0.0  | 14.9 | 10.2 | 18.1 | 0.0  | 0.0  | 9.6  | 0.0  | 0.0  | 17.7 | 0.0  | 0.0   | 0.0  | 0.0  | 11.8 | 9.4  | 8.6  | 3.5  | 0.0  | 0.0  | 0.0  | 0.0        | 0.0         | 0.0            | hsa-mir-877    |               |
| hsa-miR-887-3p    | 42.2 | 19.0 | 34.1 | 0.0  | 0.0  | 48.4 | 0.0  | 0.0  | 0.0  | 0.0  | 13.0 | 17.2 | 0.0  | 0.0  | 27.5 | 0.0  | 0.0  | 0.0  | 0.0   | 0.0  | 0.0  | 4.3  | 15.3 | 0.0  | 14.3 | 0.0  | 7.4  | 9.1  | 0.0        | 0.0         | 0.0            | hsa-mir-887    |               |
| hsa-miR-128-1-5p  | 7.2  | 17.8 | 0.0  | 0.0  | 0.0  | 0.0  | 0.0  | 0.0  | 0.0  | 0.0  | 12.2 | 0.0  | 11.5 | 6.8  | 0.0  | 0.0  | 58.8 | 32.3 | 0.0   | 0.0  | 23.9 | 6.2  | 5.2  | 0.0  | 44.4 | 3.9  | 11.9 | 0.0  | 8.0        | 8.0         | hsa-mir-128-1  |                |               |
| hsa-miR-3158-3p   | 0.0  | 7.6  | 9.3  | 19.1 | 7.1  | 0.0  | 0.0  | 0.0  | 0.0  | 9.8  | 9.0  | 36.3 | 0.0  | 0.0  | 17.3 | 0.0  | 52.3 | 14.9 | 0.0   | 26.6 | 0.0  | 21.1 | 0.0  | 0.0  | 0.0  | 11.8 | 0.0  | 0.0  | 0.0        | 0.0         | 0.0            | hsa-mir-3158-1 |               |
| hsa-miR-3158-3p   | 0.0  | 7.6  | 9.3  | 19.1 | 7.1  | 0.0  | 0.0  | 0.0  | 0.0  | 9.8  | 9.0  | 36.3 | 0.0  | 0.0  | 17.3 | 0.0  | 52.3 | 14.9 | 0.0   | 26.6 | 0.0  | 21.1 | 0.0  | 0.0  | 0.0  | 11.8 | 0.0  | 0.0  | 0.0        | 0.0         | 0.0            | hsa-mir-3158-2 |               |
| hsa-miR-3605-5p   | 10.8 | 5.0  | 20.9 | 0.0  | 0.0  | 0.0  | 17.2 | 0.0  | 0.0  | 0.0  | 10.8 | 0.0  | 0.0  | 11.4 | 0.0  | 8.8  | 0.0  | 0.0  | 0.0   | 0.0  | 0.0  | 13.4 | 27.9 | 0.0  | 0.0  | 1.8  | 0.0  | 19.3 | 5.3        | 5.3         | hsa-mir-3605   |                |               |
| hsa-miR-382-5p    | 0.0  | 25.7 | 8.4  | 38.2 | 0.0  | 0.0  | 0.0  | 0.0  | 0.0  | 0.0  | 0.0  | 0.0  | 0.0  | 14.0 | 0.0  | 0.0  | 0.0  | 0.0  | 0.0   | 0.0  | 9.4  | 20.0 | 10.3 | 14.9 | 0.0  | 0.0  | 10.0 | 0.0  | 10.7       | 10.7        | hsa-mir-382    |                |               |
| hsa-miR-4728-3p   | 4.6  | 15.6 | 0.0  | 0.0  | 8.2  | 16.8 | 21.4 | 24.1 | 0.0  | 9.1  | 6.2  | 0.0  | 0.0  | 12.5 | 0.0  | 15.3 | 0.0  | 0.0  | 0.0   | 0.0  | 8.5  | 0.0  | 0.0  | 24.3 | 0.0  | 5.8  | 20.3 | 0.0  | 8.3        | 8.3         | hsa-mir-4728   |                |               |
| hsa-miR-629-5p    | 14.0 | 10.2 | 12.5 | 28.5 | 3.7  | 0.0  | 0.0  | 0.0  | 0.0  | 10.1 | 0.0  | 0.0  | 10.8 | 0.0  | 0.0  | 0.0  | 0.0  | 0.0  | 0.0   | 18.4 | 29.4 | 5.8  | 0.0  | 0.0  | 0.0  | 2.1  | 5.4  | 0.0  | 0.0        | 0.0         | 0.0            | hsa-mir-629    |               |
| hsa-miR-6863      | 15.7 | 4.4  | 9.3  | 0.0  | 9.0  | 0.0  | 0.0  | 26.3 | 0.0  | 0.0  | 0.0  | 14.4 | 0.0  | 0.0  | 0.0  | 12.4 | 0.0  | 0.0  | 0.0   | 0.0  | 15.3 | 0.0  | 16.3 | 12.0 | 11.7 | 0.0  | 2.3  | 0.0  | 0.0        | 0.0         | 0.0            | hsa-mir-6863   |               |
| hsa-miR-760       | 9.4  | 11.4 | 0.0  | 11.2 | 8.4  | 0.0  | 15.3 | 35.5 | 0.0  | 6.8  | 0.0  | 19.4 | 0.0  | 6.8  | 14.2 | 10.0 | 0.0  | 0.0  | 0.0   | 0.0  | 5.9  | 6.9  | 0.0  | 0.0  | 0.0  | 7.1  | 4.9  | 11.3 | 9.7        | 9.7         | hsa-mir-760    |                |               |
| hsa-let-7b-3p     | 5.0  | 20.0 | 0.0  | 0.0  | 12.5 | 0.0  | 19.5 | 30.3 | 0.0  | 9.5  | 0.0  | 0.0  | 25.1 | 0.0  | 30.3 | 6.2  | 0.0  | 0.0  | 0.0   | 0.0  | 60.4 | 9.1  | 0.0  | 0.0  | 0.0  | 0.0  | 0.0  | 0.0  | 0.0        | 0.0         | 0.0            | 0.0            | hsa-let-7b    |
| hsa-miR-100-3p    | 0.0  | 13.4 | 12.2 | 14.6 | 0.0  | 0.0  | 0.0  | 28.1 | 10.8 | 9.2  | 0.0  | 11.8 | 0.0  | 18.6 | 0.0  | 0.0  | 0.0  | 0.0  | 0.0   | 0.0  | 0.0  | 0.0  | 0.0  | 0.0  | 0.0  | 0.0  | 3.7  | 0.0  | 0.0        | 0.0         | 0.0            | hsa-mir-100    |               |
| hsa-miR-127-3p    | 5.0  | 18.2 | 30.9 | 20.2 | 1.7  | 4.8  | 0.0  | 20.6 | 2.1  | 6.8  | 18.7 | 5.6  | 4.2  | 0.0  | 0.0  | 10.9 | 22.0 | 3.2  | 0.4   | 8.0  | 6.7  | 5.8  | 0.3  | 0.0  | 1.0  | 0.0  | 0.7  | 0.0  | 1.3        | 1.3         | hsa-mir-127    |                |               |
| hsa-miR-151b      | 8.6  | 10.0 | 9.0  | 0.0  | 6.0  | 14.8 | 27.1 | 18.0 | 0.0  | 11.3 | 7.5  | 0.0  | 12.2 | 0.4  | 0.4  | 0.0  | 0.0  | 0.0  | 0.0   | 9.1  | 0.0  | 0.4  | 0.0  | 0.0  | 0.0  | 11.8 | 7.5  | 0.0  | 0.0        | 0.0         | 0.0            | hsa-mir-151a   |               |
| hsa-miR-194-3p    | 2.2  | 24.5 | 20.6 | 0.0  | 0.0  | 16.8 | 0.0  | 28.5 | 0.0  | 0.0  | 0.0  | 0.0  | 11.5 | 0.0  | 0.0  | 10.9 | 0.0  | 0.0  | 19.4  | 0.0  | 0.0  | 0.2  | 0.0  | 0.0  | 0.0  | 0.0  | 0.0  | 0.0  | 0.0        | 0.0         | 0.0            | 0.0            | hsa-mir-194-2 |
| hsa-miR-20a-5p    | 4.8  | 6.4  | 0.0  | 0.0  | 0.0  | 0.0  | 0.0  | 53.1 | 0.0  | 0.0  | 0.0  | 12.4 | 0.0  | 0.0  | 0.0  | 44.2 | 0.0  | 0.0  | 0.0   | 0.0  | 10.2 | 19.6 | 0.0  | 11.4 | 0.0  | 3.5  | 0.0  | 0.0  | 11.0       | 11.0        | hsa-mir-20a    |                |               |
| hsa-miR-2110      | 0.0  | 19.6 | 18.0 | 0.0  | 0.0  | 8.8  | 0.0  | 0.0  | 0.0  | 9.7  | 0.0  | 0.0  | 0.0  | 0.0  | 18.1 | 0.0  | 0.0  | 0.0  | 31.4  | 0.0  | 10.2 | 8.1  | 9.0  | 20.0 | 11.4 | 5.3  | 6.1  | 0.0  | 4.7        | 4.7         | hsa-mir-2110   |                |               |
| hsa-miR-489-3p    | 0.0  | 6.2  | 0.0  | 0.0  | 0.0  | 0.0  | 16.4 | 0.0  | 0.0  | 0.0  | 14.7 | 0.0  | 0.0  | 15.7 | 18.5 | 0.0  | 0.0  | 0.0  | 0.0   | 0.0  | 18.4 | 0.0  | 0.0  | 24.7 | 9.1  | 0.0  | 11.3 | 0.0  | 0.0        | 0.0         | 0.0            | 0.0            | hsa-mir-489   |
| hsa-miR-509-3p    | 32.3 | 11.6 | 27.0 | 0.0  | 18.7 | 0.0  | 0.0  | 0.0  | 0.0  | 10.4 | 0.0  | 0.0  | 0.0  | 0.0  | 23.2 | 12.1 | 0.0  | 0.0  | 0.0   | 0.0  | 7.8  | 8.6  | 0.0  | 0.0  | 0.0  | 0.0  | 0.0  | 0.0  | 0.0        | 0.0         | 0.0            | 0.0            | hsa-mir-509-1 |
| hsa-miR-509-3p    | 32.3 | 11.6 | 27.0 | 0.0  | 18.7 | 0.0  | 0.0  | 0.0  | 0.0  | 10.4 | 0.0  | 0.0  | 0.0  | 0.0  | 23.2 | 12.1 | 0.0  | 0.0  | 0.0   | 0.0  | 7.8  | 8.6  | 0.0  | 0.0  | 0.0  | 0.0  | 0.0  | 0.0  | 0.0        | 0.0         | 0.0            | 0.0            | hsa-mir-509-2 |
| hsa-miR-509-3p    | 32.3 | 11.6 | 27.0 | 0.0  | 18.7 | 0.0  | 0.0  | 0.0  | 0.0  | 10.4 | 0.0  | 0.0  | 0.0  | 0.0  | 23.2 | 12.1 | 0.0  | 0.0  | 0.0   | 0.0  | 7.8  | 8.6  | 0.0  | 0.0  | 0.0  | 0.0  | 0.0  | 0.0  | 0.0        | 0.0         | 0.0            | 0.0            | hsa-mir-509-3 |
| hsa-miR-548az-5p  | 0.0  | 0.6  | 28.3 | 18.0 | 8.6  | 0.0  | 0.4  | 25.0 | 8.8  | 0.0  | 0.0  | 13.8 | 0.0  | 28.0 | 0.0  | 0.0  | 0.0  | 0.0  | 0.0   | 0.0  | 10.2 | 0.0  | 0.0  | 0.0  | 23.9 | 7.8  | 7.7  | 0.0  | 0.0        | 0.0         | 0.0            | hsa-mir-548az  |               |
| hsa-miR-10a-3p    | 12.6 | 11.2 | 0.0  | 0.0  | 0.0  | 16.5 | 0.0  | 0.0  | 0.0  | 13.0 | 0.0  | 0.0  | 0.0  | 0.0  | 0.4  | 0.0  | 0.0  | 0.0  | 13.2  | 0.0  | 7.1  | 0.0  | 9.3  | 0.0  | 0.0  | 0.0  | 3.7  | 0.0  | 20.4       | 0.3         | 0.3            | hsa-mir-10a    |               |
| hsa-miR-125b-1-3p | 9.4  | 6.8  | 17.0 | 9.7  | 6.7  | 0.0  | 38.1 | 0.9  | 7.0  | 0.0  | 0.0  | 0.0  | 0.0  | 0.0  | 0.0  | 0.0  | 0.0  | 0.0  | 0.0   | 7.3  | 0.0  | 0.0  | 10.5 | 20.5 | 20.8 | 3.0  | 10.0 | 0.0  | 1.7        | 1.7         | hsa-mir-125b-1 |                |               |
| hsa-miR-1269b     | 0.0  | 0.0  | 0.0  | 0.0  | 10.1 | 0.0  | 0.0  | 0.0  | 0.0  | 0.0  | 13.3 | 0.0  | 0.0  | 0.0  | 16.9 | 9.7  | 56.2 | 0.0  | 0.0   | 0.0  | 28.6 | 0.0  | 0.0  | 0.0  | 0.0  | 0.0  | 0.0  | 15.0 | 0.0        | 0.0         | 0.0            | 0.0            | hsa-mir-1269b |
| hsa-miR-1304-3p   | 4.4  | 9.4  | 22.5 | 30.3 | 0.0  | 16.0 | 0.0  | 0.0  | 0.0  | 0.0  | 0.0  | 0.0  | 0.0  | 0.0  | 11.2 | 0.0  | 0.0  | 0.0  | 10.1  | 5.5  | 0.0  | 0.0  | 11.7 | 0.0  | 1.6  | 0.0  | 0.0  | 0.0  | 2.7        | 2.7         | hsa-mir-1304   |                |               |
| hsa-miR-193b-5p   | 22.3 | 9.4  | 0.0  | 15.7 | 0.0  | 0.0  | 0.0  | 14.9 | 0.0  | 0.0  | 12.6 | 0.0  | 0.0  | 3.4  | 16.1 | 0.0  | 0.0  | 0.0  | 0.0   | 9.0  | 32.6 | 0.0  | 0.0  | 0.0  | 0.0  | 0.0  | 0.0  | 0.0  | 0.0        | 0.0         | 0.0            | 0.0            | hsa-mir-193b  |
| hsa-miR-195-3p    | 13.0 | 11.2 | 0.0  | 0.8  | 0.0  | 0.0  | 0.0  | 0.0  | 0.0  | 0.0  | 0.0  | 0.0  | 10.8 | 0.0  | 13.8 | 0.0  | 0.0  | 0.0  | 0.0   | 0.0  | 39.6 | 9.3  | 0.0  | 0.0  | 0.0  | 6.2  | 0.0  | 0.0  | 11.0       | 11.0        | hsa-mir-195    |                |               |
| hsa-miR-23a-3p    | 10.8 | 2.6  | 0.0  | 0.0  | 0.2  | 0.0  | 0.4  | 49.1 | 14.3 | 0.0  | 0.0  | 0.0  | 0.0  | 0.0  | 13.4 | 0.0  | 0.0  | 0.3  | 15.3  | 0.2  | 0.8  | 0.2  | 0.3  | 0.0  | 0.0  | 9.9  | 12.6 | 0.0  | 0.0        | 0.0         | 0.0            | 0.0            | hsa-mir-23a   |
| hsa-miR-29b-3p    | 12.8 | 10.8 | 10.9 | 0.0  | 0.0  | 0.0  | 0.0  | 0.0  | 0.0  | 0.0  | 0.0  | 0.0  | 0.0  | 0.0  | 0.0  | 15.3 | 0.0  | 0.0  | 0.0   | 8.7  | 0.0  | 0.0  | 16.4 | 0.0  | 0.0  | 5.5  | 24.0 | 0.0  | 0.0        | 0.0         | 0.0            | 0.0            | hsa-mir-29b-1 |
| hsa-miR-29b-3p    | 12.8 | 10.8 | 10.9 | 0.0  | 0.0  | 0.0  | 0.0  | 0.0  | 0.0  | 0.0  | 0.0  | 0.0  | 0.0  | 0.0  | 0.0  | 15.3 | 0.0  | 0.0  | 0.0   | 8.7  | 0.0  | 0.0  | 16.4 | 0.0  | 0.0  | 5.5  | 24.0 | 0.0  | 0.0        | 0.0         | 0.0            | 0.0            | hsa-mir-29b-2 |
| hsa-miR-29b-2-5p  | 5.4  | 0.0  | 0.0  | 0.0  | 0.0  | 15.4 | 0.0  | 0.0  | 0.0  | 12.6 | 0.0  | 0.0  | 0.0  | 14.8 | 0.0  | 0.0  | 0.0  | 0.0  | 0.0   | 0.0  | 21.2 | 19.4 | 0.3  | 0.0  | 23.2 | 0.0  | 0.0  | 0.0  | 0.0        | 0.0         | 0.0            | 0.0            | hsa-mir-29b-2 |
| hsa-miR-301a-3p   | 5.2  | 1.8  | 7.4  | 14.2 | 4.1  | 0.0  | 0.0  | 0.0  | 0.0  | 7.7  | 0.0  | 0.0  | 0.0  | 0.0  | 16.9 | 18.6 | 0.0  | 12.6 | 0.0</ |      |      |      |      |      |      |      |      |      |            |             |                |                |               |



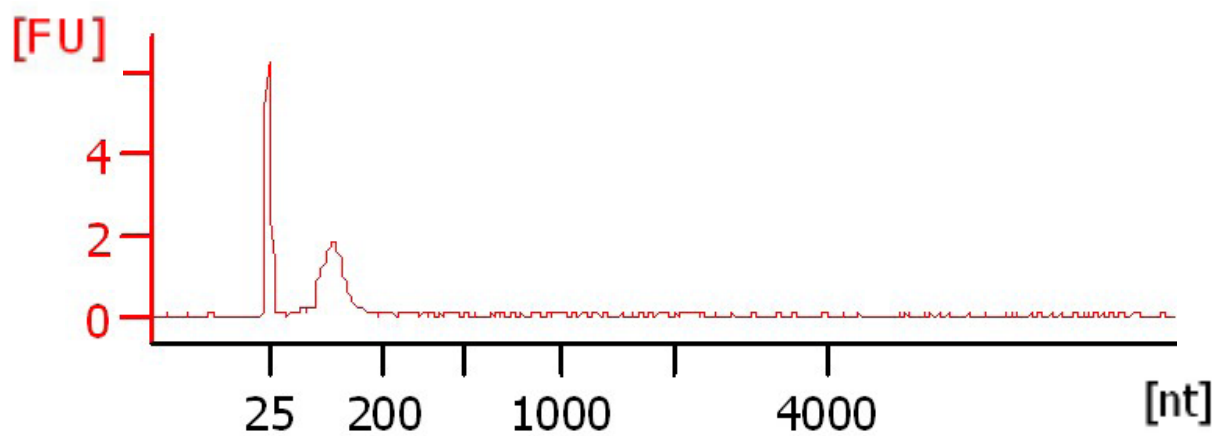

- Figure S1 -

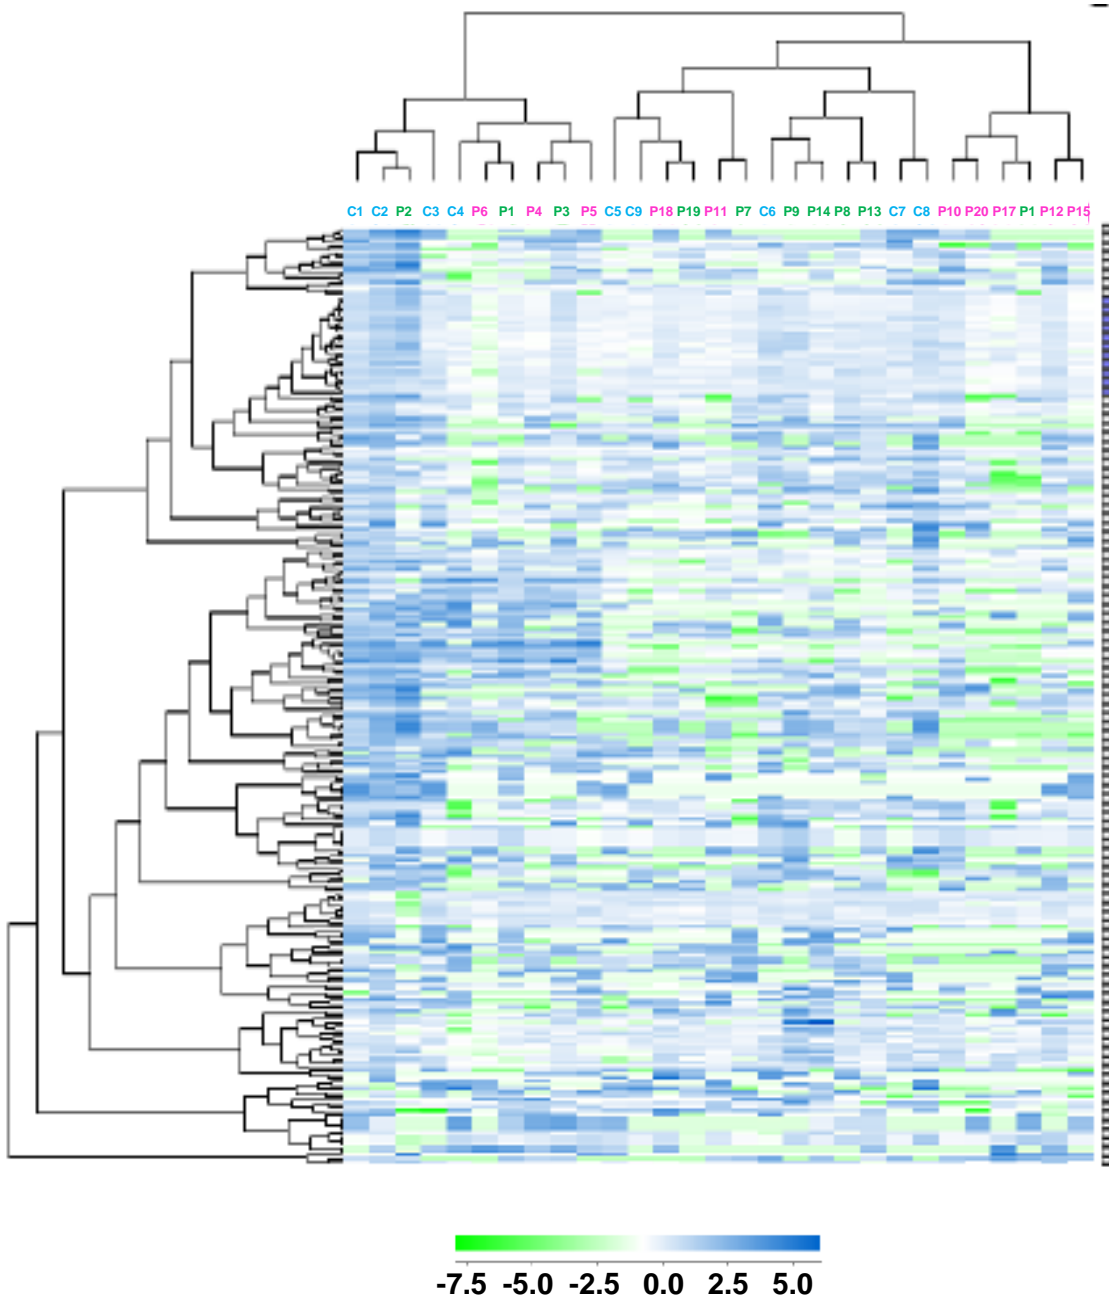

- Figure S2 -

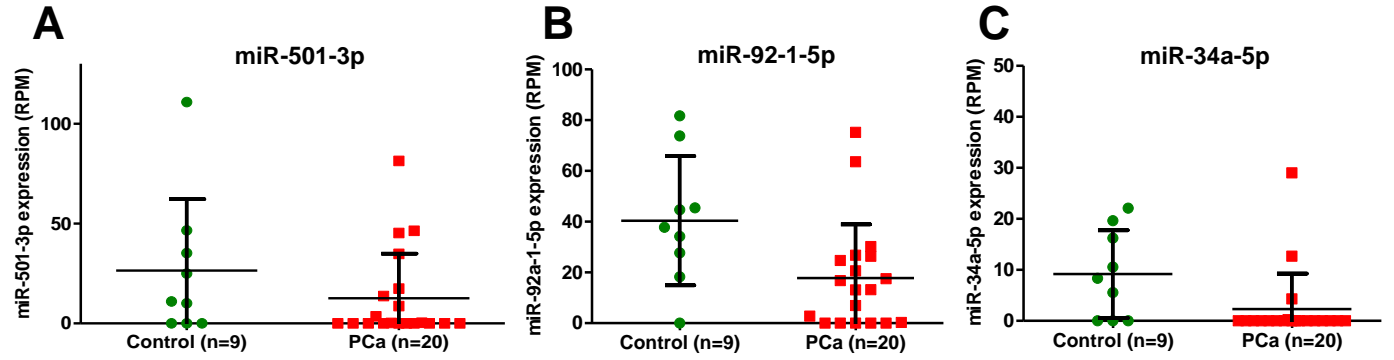

- Figure S3 -

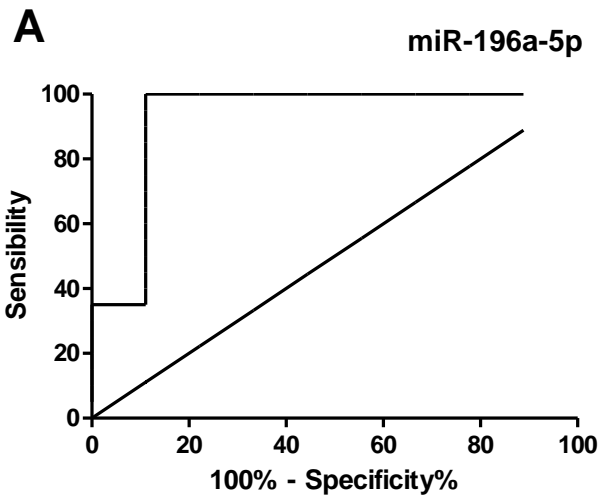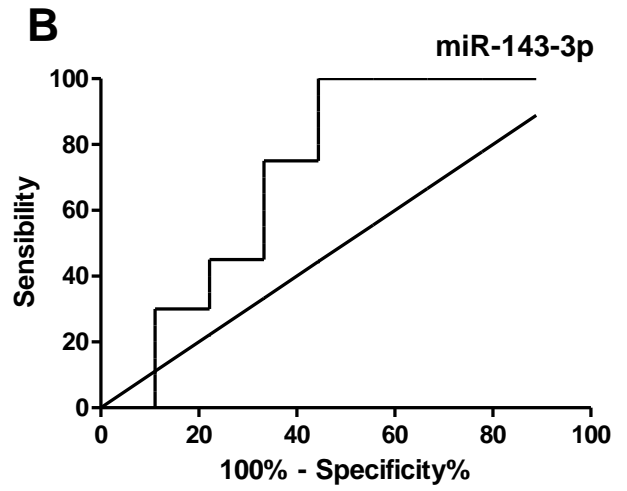

- Figure S4 -

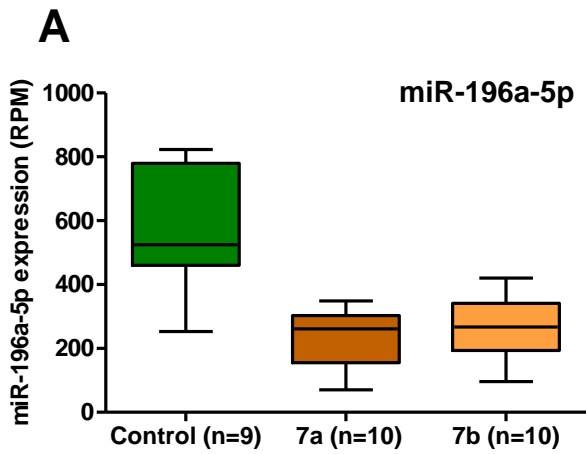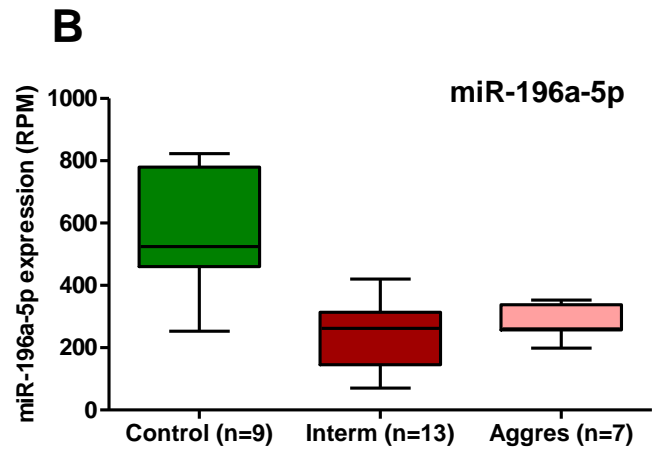

- Figure S5 -

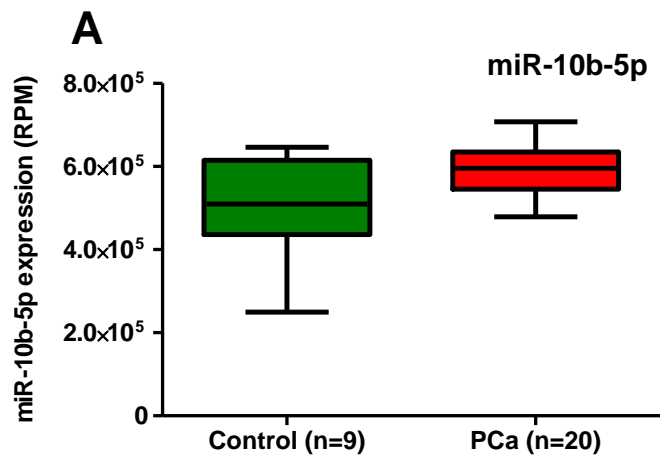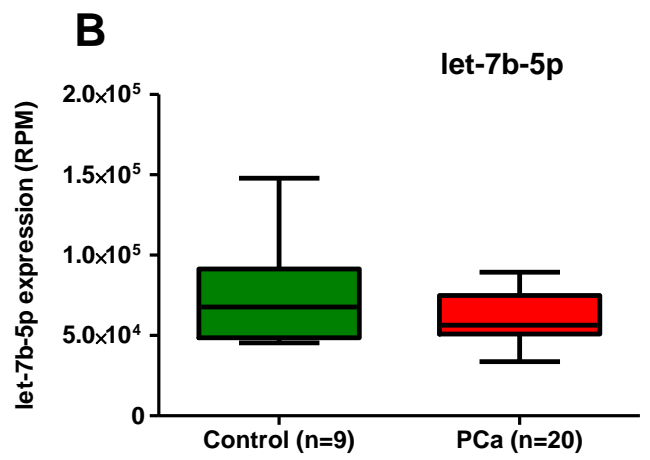

- Figure S6 -

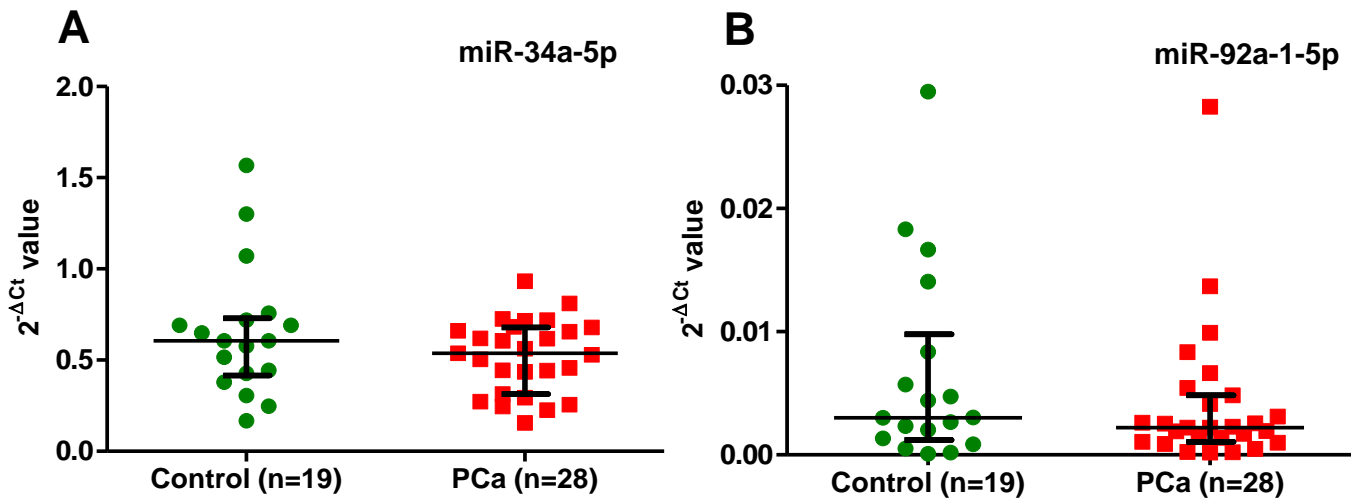

- Figure S7 -

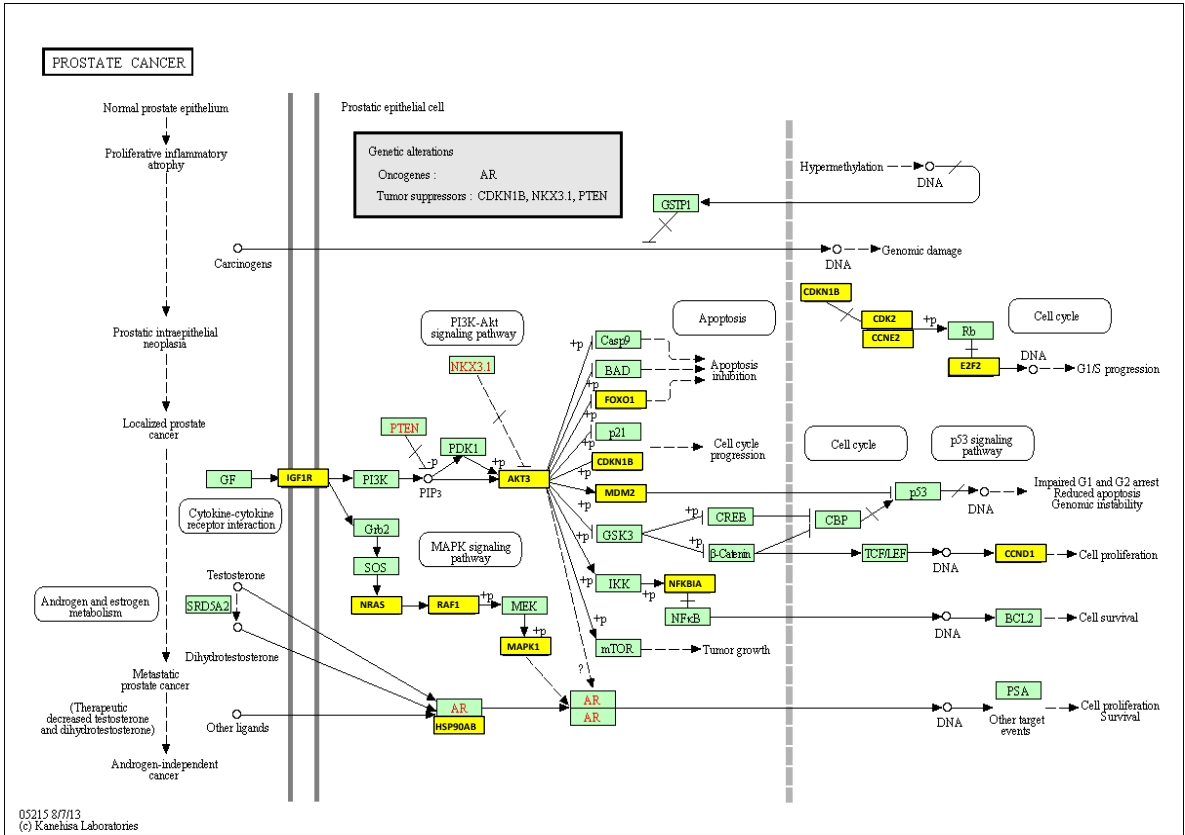

- Figure S8 -
